1  
2  
3  
4  
5  
6  
7  
8  
9  
10  
11  
12  
13  
14  
15  
16  
17  
18  
19  
20  
21  
22  
23  
24

**Constitutive nuclear accumulation of endogenous alpha-synuclein in mice causes motor dysfunction and cortical atrophy, independent of protein aggregation.**

Haley M. Geertsma<sup>1,2</sup>, Terry R. Suk<sup>1,2</sup>, Konrad M. Rieke<sup>1,2</sup>, Kyra Horsthuis<sup>1,2</sup>, Jean-Louis A. Parmasad<sup>1,2</sup>,  
Zoe Fisk<sup>1,2</sup>, Steve M. Callaghan<sup>1,2</sup>, Maxime W.C. Rousseaux<sup>1,2,3,4,#</sup>

Author Affiliations

<sup>1</sup> Department of Cellular and Molecular Medicine, University of Ottawa, Ottawa, ON, K1H8M5

<sup>2</sup> University of Ottawa Brain and Mind Research Institute, Ottawa, ON, K1H8M5

<sup>3</sup> Ottawa Institute of Systems Biology, Ottawa, ON, K1H8M5

<sup>4</sup> Eric Poulin Center for Neuromuscular Diseases, Ottawa, ON, K1H8M5

#Correspondence: [max.rousseau@uottawa.ca](mailto:max.rousseau@uottawa.ca)

25 **Abstract**

26 *Background*

27 A growing body of evidence suggests that nuclear alpha-synuclein ( $\alpha$ Syn) plays a role in the  
28 pathogenesis of Parkinson's disease (PD). However, this question has been difficult to address as  
29 controlling the localization of  $\alpha$ Syn in experimental systems often requires protein overexpression, which  
30 affects its aggregation propensity.

31 *Methods*

32 We engineered *Snca*<sup>NLS</sup> mice which localize endogenous  $\alpha$ Syn to the nucleus. We characterized these  
33 mice on a behavioral, histological, and biochemical level to determine whether the increase of nuclear  
34  $\alpha$ Syn is sufficient to elicit PD-like phenotypes.

35 *Results*

36 *Snca*<sup>NLS</sup> mice exhibit age-dependent motor deficits and altered gastrointestinal function. We found that  
37 these phenotypes were not linked to  $\alpha$ Syn aggregation or phosphorylation. Through histological analyses,  
38 we observed motor cortex atrophy in the absence of midbrain dopaminergic neurodegeneration. We  
39 sampled cortical proteomes of *Snca*<sup>NLS</sup> mice and controls to determine the molecular underpinnings of  
40 these pathologies. Interestingly, we found several dysregulated proteins involved in dopaminergic  
41 signaling, namely Darpp-32, which we further confirmed was decreased in cortical samples of the *Snca*<sup>NLS</sup>  
42 mice compared to controls via immunoblotting.

43 *Conclusions*

44 These results suggest that chronic *endogenous* nuclear  $\alpha$ Syn can elicit toxic phenotypes in mice,  
45 independent of its aggregation. This model raises key questions related to the mechanism of  $\alpha$ Syn  
46 toxicity in PD and provides a new model to study an underappreciated aspect of PD pathogenesis.

47

48

49

50 **Key Words:**

51 Nuclear alpha-synuclein, Parkinson's disease, Neurodegeneration, Darpp-32

52

53 **Background:**

54 Alpha synuclein ( $\alpha$ Syn) is a protein notorious for its involvement in Parkinson's disease (PD)  
55 pathogenesis. For one, it is a primary constituent of Lewy bodies and Lewy neurites, pathological  
56 hallmarks of PD (1). Moreover, copy number variations and missense mutations in the  $\alpha$ Syn gene, *SNCA*,  
57 cause genetic forms of PD, further reinforcing its involvement in disease etiology (2–8).  $\alpha$ Syn was first  
58 described as a presynaptic and nuclear protein (9). However, nuclear  $\alpha$ Syn has largely been  
59 overshadowed by a focus on its cytoplasmic form, likely due to the cytoplasmic localization of Lewy  
60 bodies. Despite this, several studies have linked nuclear  $\alpha$ Syn to PD on multiple levels: in cell (10–14)  
61 and animal (6,15–18) models of PD, as well as in brain tissue from individuals with  $\alpha$ Syn pathologies  
62 (synucleinopathy). These studies examined the role of nuclear  $\alpha$ Syn by overexpressing it together with  
63 mutations or a nuclear localization signal (NLS) (12,15,17–20), or upon toxin exposure (16), hinting at a  
64 role for nuclear  $\alpha$ Syn in disease pathogenesis by its involvement in DNA binding (21,22) or histone  
65 modification (17) to alter transcription, and in DNA repair (23). While these studies support a link between  
66 nuclear  $\alpha$ Syn and PD, its specific role in disease – whether deleterious or beneficial – remains clouded  
67 due to the reliance on its overexpression or exogenous stressors, making it difficult to parse out the driver  
68 of toxicity in the absence of  $\alpha$ Syn aggregation.

69 To directly test the consequence of chronic  $\alpha$ Syn mislocalization to the nucleus *in vivo*, without  
70 resorting to protein overexpression, we engineered a mouse model to endogenously express  $\alpha$ Syn with a  
71 C-terminal NLS-Flag tag driving its mislocalization to the nucleus. We extensively characterized these  
72 mice at the behavioral, histological, and biochemical level to assess whether chronic nuclear localization  
73 of  $\alpha$ Syn causes age-dependent phenotypes resembling PD or related  $\alpha$ Syn proteinopathies.

74

75 **Methods:**

76 ***Mouse Design and Engineering***

77 *Mouse Engineering:* To generate the *Snca*<sup>NLS</sup> mice, Cas9 protein was complexed to a sgRNA targeting  
78 the 3' locus of *Snca* (sgRNA target sequence: 5'-TTGGTAGCCTTCCTAATATC-3'); and, together with a  
79 single-stranded oligodeoxynucleotide (ssODN) repair template (sequence:

80 5'-CACTGTGAAGCAGACAGTTGATATCTGTCACTTCACTGACAAGGCATGCTGTTATTATTTCTTTTT  
81 CTGATATTAGGAAGGCTACCAAGACTATGAGCCTGAAGCCGACTACAAGGACGACGACGACAAGTA  
82 AGAATGTCATTGCACCCAATCTCCTAAGATCTGCCGGCTGCTCTTCCATGGCGTACAAGTGCTCAGT

83 -3'; IDT Ultramer), were injected and implanted into pseudo-pregnant FVB female mice (24). Three  
84 founder mice were generated and backcrossed onto a ~99.75% pure C57Bl6/J background (Taconic  
85 1450 SNP analysis, sequencing and subsequent backcrossing; see **Supplementary Figure 1A, B**),  
86 before being expanded onto a mixed C57Bl6/J;C57Bl6/NCrl background. One line was selected for  
87 subsequent extensive characterization and will soon be made available through the Jackson Laboratory  
88 (Jax Stock No. 036763).

89 *Genotyping*: A small (<1 mm) tail sample is digested prior to PCR amplification using primers outside of  
90 the sequence covered by the ssODN used for the initial mouse line. Forward:  
91 5'-TTTTATCTGATTGAAATGATGAGC-3'; Reverse: 5'-ATGACTGGGCACATTGGAA-3'. PCR protocol:  
92 95 °C for 2 minutes, (95 °C for 30 seconds, 56 °C for 30 seconds, 72 °C for 30 seconds) repeated for 35  
93 cycles, 72 °C for 5 minutes. Mutant allele: 273 bp; Wildtype allele: 225 bp.

#### 94 **Mouse Husbandry**

95 All mice were housed with up to 5 mice per cage on a 12-hour light-dark cycle. Mice were fed *ad libitum*  
96 and all husbandry was performed by the uOttawa Animal Care and Veterinary Services staff. All animal  
97 work was done under the approved breeding (CMMb-3009 and CMMb-3654) and behaviour  
98 (CMMe-3091) protocols approved under the uOttawa Animal Care Committee. All mice were handled  
99 daily for 1 week prior to all behavior testing and both male and female mice were used in all experiments.

#### 100 **Behavior**

101 *Open Field*: Lighting in the behavior room was set to 100 lux and mice were habituated for 60 minutes  
102 prior to testing. Mice were placed into the open field box (45 cm<sup>3</sup>) for 10 minutes with their movement  
103 recorded/analyzed with Ethovision software (Noldus Information Technology).

104 *Fecal Pellet Output*: Upon completion of the Open Field test, the number of fecal pellets excreted during  
105 the 10-minute trial were quantified.

106 *Beam Break:* Single mice were placed into a clean cage with access to food and water *ad libitum* for  
107 24 hours at the standard 12-hour light-dark cycle with their movement recorded/analyzed via Fusion  
108 software.

109 *Nesting:* Directly following Beam Break testing, one square of nestlet (5 cm<sup>2</sup> cotton pad) was placed in  
110 each Beam Break cage for 17-19 hours. Following this, the nestlets were scored on a scale of 1-5 as  
111 described in Deacon 2006 (25), with 1 and 5 representing minimal and maximal nest quality, respectively.

112 *Y maze Forced Alternation:* Mice were provided with extra-maze (irregular black cue with squared edges  
113 on right wall, black triangle on left wall) and intra-maze (Arm 1 has solid black rectangle, Arm 2 has  
114 horizontal bars, Arm 3 has diagonal stripes) cues. The room was set to 60 lux and mice were habituated  
115 for 60 minutes prior to testing. During the first 5-minute trial, Arms 2 and 3 were alternatively. Following  
116 the 30-minutes inter-trial interval, the mice were placed back into the Y maze apparatus for 5 minutes  
117 without any blocked arms and their movements were recorded/analyzed with EthoVision software.

118 *Adhesive Removal:* After a 60-minute habituation, the home cage of the mice was lightly wiped to remove  
119 all bedding material. The mice were individually placed back into the emptied home cage for a 1-minute  
120 habituation. Next, a 1 cm<sup>2</sup> square of medical adhesive was placed on each forepaw and the mice were  
121 placed back into the wiped home cage where the time to remove adhesive was measured up to a  
122 2-minute maximum.

123 *Pole test:* Following a 60-minute habituation, mice were placed on a textured metal pole (8 mm diameter,  
124 55 cm tall) ~3 cm from the top facing upwards. The mice were given up to 1 minute to turn around (facing  
125 downwards) and up to 1 minute to descend the pole.

126 *Rotarod:* Following a 60-minute habituation, mice were placed on a rod (IITC Life Sciences) rotating from  
127 4-40 revolutions per minute over 5 minutes for 4 trials per day with a 10-minute inter-trial interval. This  
128 was repeated for 3 days total.

129 *DigiGait:* Following a 60-minute habituation, mice were placed in the DigiGait treadmill (Mouse Specifics  
130 Inc.). The treadmill ran at 22 cm/s (3- and 9-months timepoints) or 18 cm/s (18-month timepoint) with a 0°  
131 incline. 3 seconds of continuous movement was recorded using DigiGait Imager software and was then  
132 analyzed with DigiGait Analysis software.

133 *Fear Conditioning:* Naïve age- and sex-matched mice were used to obtain the optimal intensity of foot  
134 shock. On day 1 of testing, mice were placed into the Fear Conditioning apparatus (Noldus Information  
135 Technology) for 6 minutes during which time the mice experienced 3 tone-shock pairings (30-second tone  
136 co-terminated with a 2-second foot shock). On day 2, mice were placed into the same Fear Conditioning  
137 apparatus for 6 minutes with no tone or foot shock. On day 3, mice were placed into a different Fear  
138 Conditioning apparatus, now altered into a triangular shape with solid floor and a vanilla scent for 3  
139 minutes with no tone then 3 minutes with the same 30-second tone but no foot shock. Freezing was  
140 measured/analyzed with EthoVision on all 3 testing days.

141 *Fecal Pellet Composition:* Mice were placed in a clean cage and their fecal pellets were collected over a  
142 1-hour period. These pellets were weighed (wet weight) then desiccated at 65 °C for 19 hours and  
143 reweighed (dry weight). The differences were calculated between these values to determine the water  
144 content.

#### 145 ***Histology***

146 See **Supplementary Table 1** for a comprehensive list of antibodies used in this study.

147 *Perfusion:* Mice were sedated with 120 mg/kg Euthanyl (DIN00141704) then perfused with 1X phosphate  
148 buffered saline (PBS) then 4 % paraformaldehyde (PFA). Brains were then extracted and incubated in  
149 4 % PFA for 72 hours prior to a 3-step sucrose dehydration with 10, 20 and 30% sucrose (24 hours  
150 each). Next, brains were flash frozen for 1 minute in -40 °C isopentane and cryosectioned at 40 µm.

151 *Immunofluorescent staining:* Cryosectioned tissue was mounted on a slide then blocked with blocking  
152 buffer (0.1 % Triton X-100, 10 % normal horse serum in 1X PBS) then incubated in primary antibody  
153 overnight at 4 °C. Next, the sections were incubated in secondary antibody before drying at room  
154 temperature for 2 minutes. The sections were then covered with #1.5 coverslips and Vectashield Antifade  
155 Mounting Medium with DAPI (MJS Biolynx cat# VECTH1200).

156 *Quick decapitation, fixation:* Mice were euthanized by isoflurane inhalation followed by decapitation and  
157 brains were quickly extracted. Brains were then submerged in 10 % buffered formalin for 72 hours prior to  
158 paraffin embedding and sectioning at 5 µm.

159 *Diaminobenzidine (DAB) staining:* Paraffin-embedded sections were deparaffinized in serial baths of  
160 xylenes and ethanol prior to a sodium citrate (10 mM sodium citrate, 0.05 % Tween-20, pH 6) antigen

161 retrieval (20 minutes at 95 °C) and 0.9 % H<sub>2</sub>O<sub>2</sub> treatment (10 minutes). Next, sections were blocked in  
162 blocking buffer (0.1 % Triton X-100, 10 % normal horse serum in 1X PBS) then incubated in primary  
163 antibody overnight at 4 °C. The following day the sections were incubated in secondary and tertiary  
164 antibody solution before exposure to DAB, dehydrating in baths of ethanol and xylenes, and covering the  
165 tissue with Permount (Fisher Scientific cat# SP15-100) and #1.5 coverslips.

166 *Toluidine Blue and H&E staining:* Staining was performed by the Louise Pelletier Histology Core facility at  
167 the University of Ottawa on paraffin-embedded 5 µm sectioned mouse brain tissue using the Leica  
168 Autostainer XL. Briefly, the sections were deparaffinized and exposed to Toluidine Blue for 10 minutes.  
169 For H&E, sections were deparaffinized, exposed to hematoxylin for 7 minutes and eosin for 30 seconds.  
170 Then, sections were dehydrated and covered with #1.5 coverslips.

171 *Stereology:* Stereology was performed as previously described (26). Briefly, for each mouse,  
172 8 cryosections were stained for tyrosine hydroxylase (TH) and quantified using StereoInvestigator  
173 software (version 11.06.2). The sections (40 µm) began at the outer limit of the substantia nigra (SNc)  
174 and every 6<sup>th</sup> section was used (Bregma -2.54 mm to -3.88 mm). Mean section thickness was determined  
175 during counting at a frequency of 10 frames (roughly 3 measurements per hemisphere). The SNc was  
176 sampled by randomly translating a grid with 150 µm x 150 µm squares in the outlined SNc and applying  
177 an optical fractionator consisting of a 75 µm x 75 µm square.

## 178 **Biochemistry**

179 See **Supplementary Table 1** for a comprehensive list of antibodies used in this study.

180 *Serial Extraction:* A 1 mm<sup>3</sup> punch of cortical brain tissue from 18-month-old mice was homogenized and  
181 resuspended in a series of increasingly stringent buffers beginning with 100 µL of TSS Buffer (140 mM  
182 NaCl, 5 mM Tris-HCl), then 100 µL TXS Buffer (140 mM NaCl, 5 mM Tris-HCl, 0.5% Triton X-100), then  
183 100 µL SDS Buffer (140 mM NaCl, 5 mM Tris-HCl, 1% SDS), as previously described (27). Total protein  
184 levels were measured using the Pierce™ BCA Assay Kit (Thermo Fisher cat# 23225).

185 *Western Blot:* Protein samples were loaded into a 12 % polyacrylamide gel and subsequently transferred  
186 to a 0.2 µm nitrocellulose membrane. Membranes were blocked in a 5 % milk solution then incubated in  
187 primary antibody (diluted in 2 % bovine serum albumin) overnight at 4 °C. Next, the membrane was  
188 incubated in a horseradish peroxidase-conjugated secondary antibody diluted in 5% milk solution. Then,

189 the membrane was rinsed with ECL Clarity solution (Bio-Rad cat# 1705061) and imaged with the GE  
190 ImageQuant LAS 4000.

191 *RNA Extraction and Real-Time Quantitative PCR:*

192 RNA was extracted from mouse brain homogenate using Trizol-Chloroform extraction (Invitrogen™ User  
193 Guide: TRIzol Reagent version B.0). Briefly, mouse brains were homogenized in 3 mL of PEPI Buffer  
194 (5 mM EDTA, 1X protease inhibitor (GenDEPOT cat# P3100-020), in 1X PBS) using a dounce  
195 homogenizer. 3 % of homogenate was added to 1 mL of TRIzol Reagent (Fisher Scientific cat# 15-596-  
196 026) and RNA was isolated following the user guide referenced above. cDNA was synthesized using 5X  
197 All-in-One RT Master Mix Kit (Bio Basic cat# HRT025-10). Real-time quantitative PCR was performed  
198 using Green-2-Go qPCR Master Mix (Bio Basic cat# QPCR004-S) with 25 ng cDNA per reaction and  
199 primers targeting mouse *Gapdh* (Forward: 5'-GGAGAGTGTTCCTCGTCCC-3', Reverse:  
200 5'-ATGAAGGGGTCGTTGATGGC-3'), *Hprt1* (Forward: 5'- TGATAGATCCATTCTATGACTGTAGA-3',  
201 Reverse: 5'-AAGACATTCTTCCAGTTAAAGTTGAG-3'), and *Snca* (Forward:  
202 5'-GAAGACAGTGGAGGGAGCTG-3', Reverse: 5'-CAGGCATGTCTTCCAGGATT-3'). Reactions were  
203 run on BioRad CFX96 thermocycler (protocol: 95 °C for 5 minutes, 40 cycles of 95 °C for 15 seconds and  
204 60 °C for 60 seconds, then melting curve). *Snca* Ct values were standardized to the average of *Hprt1* and  
205 *Gapdh*.

206 *Dopamine and Metabolite Measurement via Liquid Chromatography-Mass Spectrometry/Mass*

207 *Spectrometry (LC-MS/MS):* Striatal punches (2 mm i.d., 3 mm thick section) were extracted from  
208 18-month mouse brains and weighed prior to submitting to The Metabolomics Innovation Centre (TMIC).  
209 50 µL of tissue extraction buffer was added to each sample tube followed by homogenization and  
210 centrifugation. Supernatant was used for LC-MS/MS analysis to get the above concentrations in the unit  
211 of µM. TMIC staff applied a targeted quantitative metabolomics approach to analyze the samples using a  
212 reverse-phase LC-MS/MS custom assay. This custom assay, in combination with an ABSciex 4000  
213 QTrap (Applied Biosystems/MDS Sciex) mass spectrometer, can be used for the targeted identification  
214 and quantification of measure dopamine (DA), homovanillic acid (HVA), 5-hydroxyindoleacetic acid (5-  
215 HIAA), and 3,4-dihydroxyphenylacetic acid (DOPAC). The method combines the derivatization and  
216 extraction of analytes, and the selective mass-spectrometric detection using multiple reaction monitoring



217 (MRM) pairs. Isotope-labeled internal standards and other internal standards are used for metabolite  
218 quantification. The custom assay contains a 96 deep-well plate with a filter plate attached with sealing  
219 tape, and reagents and solvents used to prepare the plate assay. First 14 wells were used for one blank,  
220 three zero samples, seven standards and three quality control samples. For all metabolites except  
221 organic acid, samples were thawed on ice and were vortexed and centrifuged at 13,000x *g*. 10  $\mu$ L of each  
222 sample was loaded onto the center of the filter on the upper 96-well plate and dried in a stream of  
223 nitrogen. Subsequently, phenyl-isothiocyanate was added for derivatization. After incubation, the filter  
224 spots were dried again using an evaporator. Extraction of the metabolites was then achieved by adding  
225 300  $\mu$ L of extraction solvent. The extracts were obtained by centrifugation into the lower 96-deep well  
226 plate, followed by a dilution step with MS running solvent.

227 For organic acid analysis, 150  $\mu$ L of ice-cold methanol and 10  $\mu$ L of isotope-labeled internal standard  
228 mixture was added to 50  $\mu$ L of sample for overnight protein precipitation. Then it was centrifuged at  
229 13000x *g* for 20 min. 50  $\mu$ L of supernatant was loaded into the center of wells of a 96-deep well plate,  
230 followed by the addition of 3-nitrophenylhydrazine (NPH) reagent. After incubation for 2h, BHT stabilizer  
231 and water were added before LC-MS injection.

232 Mass spectrometric analysis was performed on an ABSciex 4000 Qtrap® tandem mass spectrometry  
233 instrument (Applied Biosystems/MDS Analytical Technologies, Foster City, CA) equipped with an Agilent  
234 1260 series UHPLC system (Agilent Technologies, Palo Alto, CA). The samples were delivered to the mass  
235 spectrometer by a LC method followed by a direct injection (DI) method. Data analysis was done using  
236 Analyst 1.6.2.

237 *TMT10plex™ Proteomics via Liquid Chromatography-Mass Spectrometry (LC-MS)*: Whole mouse cortex  
238 was dissected from 9-month-old mouse brain and peptides were isolated using the EasyPep™ Mini MS  
239 Sample Prep Kit (Thermofisher cat# A40006) following manufacturer instructions. These samples were  
240 labelled with the TMT10plex™ Isobaric Label Reagent Set (Thermofisher cat# 90406) then combined into  
241 a single tube and fractionated into 12 samples using the Pierce™ High pH Reversed-Phase Peptide  
242 Fractionation Kit (Thermofisher cat# 84868). Fractions 2, 3, 9, 10, 11, and 12 were combined due to low  
243 protein concentration (combined to have a consistent protein concentration with other fractions) and the 6  
244 final fractions were submitted for LC-MS to the Ottawa Hospital Research Institute Proteomics Core

245 Facility. LC-MS was performed using Orbitrap Fusion Lumos mass spectrometer with UltiMate 3000  
246 RLSC nano HPLC (Thermo Scientific). Proteowizard MS-CONVERT was used to generate peak lists for  
247 preliminary qualitative analysis using MASCOT software version 2.7.0 (Matrix Science, UK). Protein  
248 identification and quantitative analysis was performed using MaxQuant (Tyanova, Nature Protocols 2016,  
249 11:2301). The reference proteome for peptide spectrum matching was UniProt/Mus musculus (version  
250 2020-10-06). The MaxQuant results were exported to Scaffold Q+S (Proteome Software, USA) for further  
251 analysis and viewing.

### 252 **Statistical Analyses:**

253 All statistical analyses were performed using GraphPad Prism (version 9.1.2) using the appropriate  
254 statistical test, either Student's t-test for simple comparisons or One- or Two-way ANOVA followed by  
255 Bonferroni post-hoc analysis for multiple comparisons. The survival curve was analyzed using a log-rank  
256 Mantel-Cox test. The Mann-Whitney test with Benjamini-Hochberg correction was used with Scaffold  
257 (version 5.0.0) to analyze the TMT10plex<sup>TM</sup> mass spectrometry dataset. Statistical tests used, sample  
258 sizes, and p-values are delineated in each figure legend.

259

### 260 **Results:**

#### 261 **Effective nuclear targeting of $\alpha$ Syn in *Snca*<sup>NLS</sup> mice**

262 To study if nuclear  $\alpha$ Syn is sufficient to elicit age-related behavioral and pathological phenotypes, we  
263 generated a mouse line that targets endogenous  $\alpha$ Syn to the nucleus via the knockin of an NLS-Flag tag  
264 on  $\alpha$ Syn (*Snca*<sup>NLS</sup>). The NLS-Flag construct was targeted to the 3' end of the *Snca* coding sequence with  
265 the modified *Snca-NLS-Flag* gene predicted to transcribe a fusion protein of wildtype  $\alpha$ Syn with a  
266 C-terminal NLS-Flag tag (**Fig. 1A**). After generating and backcrossing mice (see Methods and  
267 **Supplementary Figure 1**), we confirmed the knockin via sequencing (**Supplementary Figure 1B**) and  
268 were able to distinguish between the genotypes via a PCR band shift (**Fig. 1B**) and a larger protein size  
269 via western blot (**Fig. 1C**). Mice were born at expected Mendelian ratios (**Supplementary Figure 1C**),  
270 confirming that insertion of this tag did not pose major developmental deficits.

271 We next examined the efficiency of the NLS-Flag tag by quantifying the level of nuclear  $\alpha$ Syn in  
272 primary cortical neuron cultures through immunofluorescent microscopy. We observed a 3-fold increase

273 in nuclear  $\alpha$ Syn in *Snca*<sup>NLS/NLS</sup> and a 1.5-fold increase in *Snca*<sup>NLS/+</sup> compared to *Snca*<sup>+/+</sup> (wildtype) cells  
274 (**Fig. 1D**). This trend was consistent in stained adult mouse brain tissue (**Fig. 1E**). Importantly, this  
275 roughly corresponds to the 2.5-3-fold increase of nuclear  $\alpha$ Syn which we and others have previously  
276 observed in post-mortem brain tissue from individuals with PD or other animal models of synucleinopathy,  
277 suggesting the model displays a disease-relevant increase of nuclear  $\alpha$ Syn (6,15–18,26).

278 **Increased nuclear  $\alpha$ Syn leads to an age-dependent motor decline, gastrointestinal dysmotility and**  
279 **premature lethality.**

280 To test whether chronic nuclear accumulation of  $\alpha$ Syn is sufficient to elicit PD-like phenotypes over time,  
281 we subjected *Snca*<sup>NLS/NLS</sup> mice and littermates to a battery of behavior tests at 3-, 9-, and 18-months of  
282 age. We found that the *Snca*<sup>NLS/+</sup> and *Snca*<sup>NLS/NLS</sup> mice performed similarly to wildtype at 3-months of age,  
283 with a mild motor deficit in the *Snca*<sup>NLS/NLS</sup> mice appearing during beam break (**Fig. 2A**) and rotarod (**Fig.**  
284 **2B**) tests. By 9-months, however, the *Snca*<sup>NLS/NLS</sup> mice displayed a severe motor deficit in rotarod (**Fig.**  
285 **2B**) as well as a delayed time to contact their forepaws in the adhesive removal test (**Fig. 2C**).  
286 Interestingly, *Snca*<sup>NLS/+</sup> mice also exhibited a significant deficit on the rotarod test – suggestive of a  
287 dominant phenotype. Surprisingly, after aging these mice to 18 months, we observed milder motor  
288 phenotypes relative to wildtype controls; likely due to the 18-month wildtype mice showing increased  
289 difficulty at performing these tasks (**Supplementary Figure 2**).

290 With increasing awareness around non-motor symptoms in PD, we also measured cognition,  
291 anxiety, and overall wellness in the *Snca*<sup>NLS</sup> line. We found that *Snca*<sup>NLS/NLS</sup> and *Snca*<sup>NLS/+</sup> mice performed  
292 similarly to their wildtype littermates in non-motor behavior tests at all timepoints (**Supplementary**  
293 **Figures 3-5**). In addition to motor decline, people living with PD often experience gastrointestinal  
294 difficulties such as constipation (28,29). To measure constipation in our mice, we examined fecal  
295 excretions in the span of an hour. We found that 18-month-old *Snca*<sup>NLS/NLS</sup> mice excretions contained  
296 significantly less water than their wildtype counterparts (**Fig. 2D**) and a trend for decreased fecal matter  
297 production (**Fig. 2E**). Lastly, we observed a trend for early lethality in the *Snca*<sup>NLS/NLS</sup> mice compared to  
298 their wildtype littermates, where 25% of *Snca*<sup>NLS/NLS</sup> mice died by 20 months of age (**Fig. 2F**). Taken

299 together, the *Snca*<sup>NLS/NLS</sup> mice display age-dependent motor decline, gastrointestinal dysfunction, and  
300 premature lethality.

301 ***Snca*<sup>NLS/NLS</sup> mice exhibit cortical atrophy, independent of  $\alpha$ Syn aggregation or dopaminergic**  
302 **neurodegeneration.**

303 Many studies suggest that  $\alpha$ Syn toxicity is intrinsically tied its aggregation, as the two are often  
304 associated in humans with PD and in animal models of the disease (1,30,31). However, models of  $\alpha$ Syn  
305 toxicity often rely on the introduction of synthetically derived misfolded  $\alpha$ Syn fibrils (32,33) or  
306 overexpression of  $\alpha$ Syn (15,34), thereby potentiating its aggregation *in vivo*. Given that the *Snca*<sup>NLS</sup> mice  
307 display age-dependent behavioral phenotypes, yet do not rely on  $\alpha$ Syn overexpression, we asked  
308 whether accumulation of endogenous  $\alpha$ Syn in the nucleus leads to its aggregation and thusly contributes  
309 to its toxicity. We examined both the solubility of  $\alpha$ Syn as well as its pathologically-linked phosphorylation  
310 at serine residue 129 (pS129) by biochemical fractionation of brain samples of *Snca*<sup>NLS/NLS</sup> mice  
311 compared to littermates. We used the *mThy1-SNCA* (“line 61”) transgenic and *Snca* knockout (*Snca*<sup>-/-</sup>)  
312 mouse lines as positive (34) and negative (35) controls, respectively. To our surprise, we found that the  
313 accumulation of nuclear  $\alpha$ Syn does not lead to aggregation (**Fig. 3A**), nor does it become phosphorylated  
314 at S129 (**Fig. 3A, B**), and in fact total  $\alpha$ Syn levels are reduced in these mice (**Fig. 3A-C**). These findings  
315 were further supported by histology, which showed no marked increase in pS129 in aged *Snca*<sup>NLS/NLS</sup>  
316 mice compared to their respective littermates (**Fig. 3D**). This suggests that nuclear accumulation of  $\alpha$ Syn  
317 confers toxicity independent of its aggregation.

318 A hallmark of PD is nigrostriatal dopaminergic neurodegeneration. Due to the relatively high  
319 expression of  $\alpha$ Syn in dopaminergic neurons (**Fig. 1C**) (36), we hypothesized nuclear  $\alpha$ Syn could be  
320 acutely toxic to dopaminergic neurons, causing their death, and ultimately leading to the observed  
321 behavioral deficits in *Snca*<sup>NLS</sup> mice. To our surprise, we found that young and aged *Snca*<sup>NLS/NLS</sup> mice had  
322 intact nigrostriatal tracts, when evaluated by striatal tyrosine hydroxylase (TH) fiber density and  
323 stereological estimation of dopaminergic cell number in the SNc at 3- and 18-months of age (**Fig. 4A-B**,  
324 **Supplementary Figure 3E**). Moreover, HPLC analysis of mouse striata revealed that 18-month-old mice  
325 across genotypes exhibit similar levels of dopamine and its metabolites (DOPAC, HVA, 5-HIAA; **Fig. 4C**).

326 Since *Snca*<sup>NLS/NLS</sup> mice exhibit motor defects without nigrostriatal degeneration nor  $\alpha$ Syn  
327 aggregation, we took a step back to ask whether nuclear  $\alpha$ Syn may impact other areas of the brain, thus  
328 contributing to PD-like phenotypes. Cortical involvement has long been linked to several  
329 synucleinopathies including PD, dementia with Lewy bodies (DLB), and PD with dementia (PDD) (31,37–  
330 39). We therefore explored higher order cortical areas to determine whether *Snca*<sup>NLS/NLS</sup> mice exhibit  
331 neurodegenerative features outside of the SNc. We conducted gross anatomical studies using  
332 hematoxylin and eosin (H&E) and toluidine blue staining and found significant anterior cortical thinning in  
333 the motor cortex (**Fig. 4D**) and a marked increase in pyknotic cells (**Fig. 4E**) throughout the cortex of 18-  
334 month-old *Snca*<sup>NLS/NLS</sup> mice. These results suggest a potential etiology for the underlying motor behavior  
335 dysfunction in these mice.

### 336 **Unbiased proteomics uncovers reduced parvalbumin levels in *Snca*<sup>NLS/NLS</sup> mice**

337 We followed an unbiased strategy to uncover the molecular mechanisms underlying the behavioral and  
338 histological phenotypes of the *Snca*<sup>NLS/NLS</sup> mice via quantitative proteomic analysis on cortices from 9-  
339 month-old mice. At this age, *Snca*<sup>NLS/NLS</sup> mice exhibit robust behavioral abnormalities (**Fig. 2**), allowing  
340 identification of early molecular changes that drive the late-stage cortical atrophy exhibited in these mice  
341 and in PD. To quantify proteomic differences in wildtype and *Snca*<sup>NLS/NLS</sup> mice, we performed pooled  
342 TMT10plex labeling for 5 wildtype and 5 *Snca*<sup>NLS/NLS</sup> mouse cortices followed by mass spectrometry to  
343 identify differential proteomic changes (**Fig. 5A**). This approach yielded a list of nearly 1,800 proteins, of  
344 which 114 had a Log<sub>2</sub> fold-change of  $\pm 1$  relative to wildtype (**Fig. 5B**). Of these 114 hits, 66 were  
345 downregulated and 48 were upregulated (**Supplementary Table 2**). GO term analysis revealed a  
346 significant enrichment for biological processes that are disturbed in PD, including regulation of GPCR  
347 signaling (**Fig. 5C**). To increase the stringency of our list, we filtered these hits using a statistical cut-off  
348 (Mann-Whitney *p*-value < 0.05). From this, we identified 10 high-confidence hits (**Fig. 5D**). Interestingly,  
349 among these 10 hits we noticed a few proteins of particular importance in DA signalling and have been  
350 associated with PD, such as *Cacna1e*, *Darpp-32*, *Fgf1*, *Gng7*, *Pde10a*, and *SerpinA1a* (40–47).  
351 Interestingly, we also observed a marked reduction in parvalbumin (PV), a protein recently shown to be  
352 disrupted in PD and in animal models of synucleinopathy (47). We confirmed the reduction of *Darpp-32* in

353 the *Snca*<sup>NLS/NLS</sup> mice using western blot (**Fig. 5E**), thereby validating our proteomics approach.

354 Collectively, these data suggest that disrupted dopaminergic signaling pathways that may underlie

355 nuclear  $\alpha$ Syn toxicity in PD.

356

357 **Discussion:**

358 The mechanisms underlying  $\alpha$ Syn toxicity have been difficult to pin down. We and others have previously

359 shown that nuclear  $\alpha$ Syn is increased in the PD post-mortem brain and in animal models harboring *SNCA*

360 mutations (6,13,20,26,48). Nonetheless, previous studies examining the role of nuclear  $\alpha$ Syn in PD

361 pathogenesis have yielded conflicting results, ranging from neurodegenerative (13,15,17,48) to

362 neuroprotective (20,23) phenotypes. This may be in part due to the degree of overexpression of  $\alpha$ Syn or

363 the choice of read-out in these models. Our study sought to overcome this by answering if the nuclear

364 accumulation of *native*  $\alpha$ Syn is sufficient to cause PD-like phenotypes in mice. We engineered a mouse

365 model with an *NLS-Flag* knockin on *Snca* to characterize the effects of chronically increased nuclear

366  $\alpha$ Syn. We found that *Snca*<sup>NLS/NLS</sup> mice reveal PD-like phenotypes including age-dependent motor decline

367 and constipation, but also exhibit cortical atrophy, and reduced survival. The cortical atrophy we observed

368 draws parallels to the cell loss seen in synucleinopathies with cortical involvement like DLB and PDD

369 (31,37–39). Moreover, the anatomical location of this cell loss dovetails with the motor deficits seen in

370 these mice and may shed light onto how nuclear  $\alpha$ Syn in PD may be linked to cortical dysfunction and

371 disease manifestation. When examining the proteomic profile of the *Snca*<sup>NLS/NLS</sup> mice, we found a few

372 high-confidence hits that have been previously associated with PD. Among these, we identified Pde10a,

373 Darpp-32, SerpinA1a, parvalbumin, and Gng7. These are of particular interest as they hint at the potential

374 role nuclear  $\alpha$ Syn is playing in PD manifestation. Firstly, Pde10a and Darpp-32 are known to play a role

375 in DA signalling, which may explain why the *Snca*<sup>NLS/NLS</sup> mice exhibit a motor phenotype without loss in

376 striatal DA. Secondly, a previous group also found a significant increase in SerpinA1a and decrease in

377 Darpp-32 in mice injected with  $\alpha$ Syn PFFs and transgenic mice that overexpress *hA53T-SNCA* (49).

378 Another PD mouse model, the *Thy1-SNCA* mice, shows loss of parvalbumin, which also occurs in PD

379 patients (47,50). Additionally, we found a reduction in cortical Gng7. Interestingly, *Gng7* knockout mice

380 exhibit a significant age-dependent motor deficits, particularly in the rotarod test, which was the motor

381 assay with which the *Snca*<sup>NLS/NLS</sup> mice had the most difficulty (51). Together, these changes in protein  
382 levels hint at the possible mechanisms whereby nuclear  $\alpha$ Syn elicits toxicity.

383 While characterizing *Snca*<sup>NLS/NLS</sup> mice, we consistently noted how this mouse line diverges from  
384 *Snca*<sup>-/-</sup> mouse phenotypes (35), cementing that *Snca*<sup>NLS/NLS</sup> mouse phenotypes are likely gain-of-function.  
385 To wit, *Snca*<sup>-/-</sup> mice exhibit mild synaptic deficits in the absence of gross motor or non-motor deficits  
386 (35,52), likely due to compensation by  $\beta$ -synuclein and, to a lesser extent,  $\gamma$ -synuclein (53–55). Indeed,  
387 the motor phenotypes appear to be dependent on the local dose of nuclear  $\alpha$ Syn as even the *Snca*<sup>NLS/+</sup>  
388 mice exhibit some motor behavior deficits – albeit to a lesser extent than their *Snca*<sup>NLS/NLS</sup> littermates,  
389 suggesting that they are due to a gain-of-function of nuclear  $\alpha$ Syn and not a loss-of-function of synaptic  
390  $\alpha$ Syn. Nevertheless, we cannot exclude a model in which partial loss of synaptic  $\alpha$ Syn combined with  
391 increased nuclear  $\alpha$ Syn may drive the age-dependent behavioural and pathological phenotypes seen in  
392 *Snca*<sup>NLS</sup> mice. Strikingly, behavioral and histological phenotypes in *Snca*<sup>NLS</sup> mice occur independently  
393 from  $\alpha$ Syn aggregation and pathogenic phosphorylation. This suggests a heretofore underappreciated  
394 role of *soluble*, nuclear  $\alpha$ Syn in the pathogenesis of PD.

395 The cellular mechanisms that drive the nuclear accumulation of  $\alpha$ Syn and its subsequent  
396 sequelae in PD remain elusive. Whether active or passive mechanisms bring  $\alpha$ Syn to the nucleus is  
397 unknown. Native  $\alpha$ Syn does not possess an NLS, therefore, it may be driven into the nucleus by passive  
398 mechanisms (it can traverse the nuclear pore complex due to its small size) (56) and could be kept there  
399 by interaction with nuclear components (e.g. histones or DNA) (16,17,20,22,23,57) or via uncharacterized  
400 modifications. Alternatively, active mechanisms such as its interaction with TRIM28 (26) or RAN (14) may  
401 be key in regulating its nuclear import. Moreover,  $\alpha$ Syn likely has an important native role in the nucleus,  
402 particularly during mouse embryonic development, where nuclear  $\alpha$ Syn constitutes up to 40% of its total  
403 cellular distribution, compared to 3-15% of total cellular distribution in adult mice (20). There,  $\alpha$ Syn is  
404 suggested to bind both DNA and histones to modulate gene expression (16,17,22,23,57–60). In wildtype  
405 mice, nuclear  $\alpha$ Syn was shown to be neuroprotective by binding to DNA and colocalizing with DNA  
406 damage response elements to protect against DNA damage (23). Whether the increase in nuclear  $\alpha$ Syn

407 observed in PD – modeled in the *Snca*<sup>NLS</sup> mice – causes a gain of this normal developmental function or  
408 a neomorphic function will be important to establish, to facilitate future therapeutic development.

409

410 **Conclusion:**

411 This study tested whether a chronic accumulation of endogenous  $\alpha$ Syn in the nucleus is sufficient to elicit  
412 PD-like phenotypes in mice. To do so, we generated a mouse allele with a nuclear localization signal on  
413 endogenous  $\alpha$ Syn. These mice exhibit motor deficits, cortical atrophy, and a trend for reduced survival.  
414 Biochemical profiling of cortices from these mice identified changes in a handful of proteins involved in  
415 dopaminergic signaling, including Darpp-32, which may be key in driving these phenotypes. This new  
416 model enables the selective study of nuclear  $\alpha$ Syn, thus allowing the field to amass a greater  
417 understanding of its role in disease independent of its often-studied aggregation.

418

419 **List of Abbreviations:**

420 5-HIAA: 5-hydroxyindoleacetic acid

421  $\alpha$ Syn: alpha-synuclein

422 DA: dopamine

423 Darpp-32: dopamine- and cAMP-regulated neuronal phosphoprotein

424 DOPAC: 3,4-dihydroxyphenylacetic acid

425 GO: Gene ontology

426 HPLC: high-performance liquid chromatography

427 HVA: homovanillic acid

428 NLS: nuclear localization signal

429 PD: Parkinson's disease

430 PV: parvalbumin

431 SNc: Substantia Nigra *pars compacta*

432 TH: tyrosine hydroxylase

433

434



435 **Declarations:**

436 *Ethics approval*

437 All animal work was performed under animal use protocols (breeding protocols CMMb-3009 and CMMb-  
438 3654, and experimental protocol CMMe-3091) approved by the University of Ottawa Animal Care  
439 Committee. The University of Ottawa is certified by the Canadian Council on Animal Care.

440

441 *Availability of data and materials*

442 All data generated and analyzed during this study are included in this published article. The *Snca*<sup>NLS</sup>  
443 mouse line will be made available through the Jackson Laboratory (Jax Stock No. 036763). Mass  
444 spectrometry data will be made available through Proteome Xchange.

445

446 *Competing interests*

447 The authors declare that they have no competing interests.

448

449 *Funding*

450 This research was supported in part the Parkinson's Foundation Stanley Fahn Junior Faculty Award (PF-  
451 JFA-1762, M.W.C.R.), the Canadian Institutes of Health Research (PJT-169097), the Parkinson Canada  
452 New Investigator Award (2018-00016, M.W.C.R.), the Parkinson's Research Consortium (PRC) Bonnie  
453 and Don Poole - (H.M.G.) and Larry Haffner Fellowship (K.M.R.), the Ontario Graduate Scholarship  
454 (H.M.G.), the Queen Elizabeth II Scholarship (H.M.G.), the ALS Society of Canada in partnership with the  
455 Brain Canada Foundation through the Brain Canada Research Fund, with the financial support of Health  
456 Canada, for financial support through the ALS Trainee Award Program 2019 (T.R.S.). The views  
457 expressed herein do not necessarily represent the views of the Minister of Health or the Government of  
458 Canada.

459

460 *Authors' contributions*

461 H.M.G. generated the studied mouse cohorts, performed all behavioral tasks (with the help of K.M.R.,  
462 Z.F., and S.M.C), and analyzed all figures included in this published article. K.M.R. also aided in tissue

463 acquisition and processing and provided significant intellectual support. K.H. aided in the analysis of  
464 stained tissue. J.L.A.P. and T.R.S. harvested and maintained all primary cortical neurons. T.R.S. also  
465 obtained all primary neuron images and performed qPCR experiments. M.W.C.R conceptualized the  
466 study, designed the knockin mice, assisted in data collection and analysis. H.M.G. and M.W.C.R. wrote  
467 the manuscript and all authors provided edits.

468

#### 469 *Acknowledgements*

470 The authors thank M.G. Schlossmacher and J.J. Tomlinson (Ottawa Hospital Research Institute, OHRI)  
471 and M. Farrer (University of Florida) for *Snca*<sup>-/-</sup> mice and R. Rissman and E. Masliah (University of  
472 California, San Diego) for the *mThy1-SNCA* ("line 61") mice. The authors thank H.Y. Zoghbi and J.P.  
473 Revelli (Baylor College of Medicine) for initial project discussions, reagent development and the freedom  
474 to explore new ideas and bring mice to the Rousseaux lab with no strings attached. The authors also  
475 thank all members of the Rousseaux, Schlossmacher, and Zoghbi labs for important discussions and  
476 critical feedback on the manuscript. The authors thank K. Ure for her guidance in conceptualizing and  
477 analyzing behaviour tests. The authors also thank the Schlossmacher, M. Tiberi (OHRI), and S.X. Chen  
478 (uOttawa) labs for their generous donation of antibodies. The authors thank S.X. Chen and K. Ure for  
479 providing critical feedback to the manuscript. The authors also thank the following Core facilities from the  
480 University of Ottawa and the Ottawa Hospital Research Institute for use of their facility, equipment, and  
481 expertise: Animal Behaviour and Physiology Core, Cell Biology and Imaging Acquisition Core, Louise  
482 Pelletier Histology Core, and the OHRI Proteomics Core. The authors also thank the Genome Engineered  
483 Rodent Models Core at Baylor College of Medicine and Animal Care and Veterinary Service. Figs. 1D,  
484 5A, and Supplementary Figures 1A,C were generated in part with Biorender.com. All histograms were  
485 generated with Prism 9.

486

487

488 *References*

- 489 1. Spillantini MG, Schmidt ML, Lee VM, Trojanowski JQ, Jakes R, Goedert M. Alpha-synuclein in Lewy  
490 bodies. *Nature*. 1997 Aug 28;388(6645):839–40.
- 491 2. Polymeropoulos MH, Lavedan C, Leroy E, Ide SE, Dehejia A, Dutra A, et al. Mutation in the alpha-  
492 synuclein gene identified in families with Parkinson's disease. *Science*. 1997 Jun  
493 27;276(5321):2045–7.
- 494 3. Krüger R, Kuhn W, Müller T, Woitalla D, Graeber M, Kösel S, et al. Ala30Pro mutation in the gene  
495 encoding alpha-synuclein in Parkinson's disease. *Nat Genet*. 1998 Feb;18(2):106–8.
- 496 4. Zarranz JJ, Alegre J, Gómez-Esteban JC, Lezcano E, Ros R, Ampuero I, et al. The new mutation,  
497 E46K, of  $\alpha$ -synuclein causes parkinson and Lewy body dementia. *Ann Neurol*. 2004;55(2):164–73.
- 498 5. Appel-Cresswell S, Vilarino-Guell C, Encarnacion M, Sherman H, Yu I, Shah B, et al. Alpha-  
499 synuclein p.H50Q, a novel pathogenic mutation for Parkinson's disease. *Mov Disord Off J Mov*  
500 *Disord Soc*. 2013 Jun;28(6):811–3.
- 501 6. Fares M-B, Ait-Bouziad N, Dikiy I, Mbefo MK, Jovičić A, Kiely A, et al. The novel Parkinson's  
502 disease linked mutation G51D attenuates in vitro aggregation and membrane binding of  $\alpha$ -  
503 synuclein, and enhances its secretion and nuclear localization in cells. *Hum Mol Genet*. 2014 Sep  
504 1;23(17):4491–509.
- 505 7. Ghosh D, Sahay S, Ranjan P, Salot S, Mohite GM, Singh PK, et al. The Newly Discovered  
506 Parkinson's Disease Associated Finnish Mutation (A53E) Attenuates  $\alpha$ -Synuclein Aggregation and  
507 Membrane Binding. *Biochemistry*. 2014 Oct 21;53(41):6419–21.
- 508 8. Konno T, Ross OA, Puschmann A, Dickson DW, Wszolek ZK. Autosomal dominant Parkinson's  
509 disease caused by SNCA duplications. *Parkinsonism Relat Disord*. 2016 Jan;22 Suppl 1:S1-6.
- 510 9. Maroteaux L, Campanelli JT, Scheller RH. Synuclein: a neuron-specific protein localized to the  
511 nucleus and presynaptic nerve terminal. *J Neurosci Off J Soc Neurosci*. 1988 Aug;8(8):2804–15.

- 512 10. Herman SA, Coffin JM. Differential transcription from the long terminal repeats of integrated avian  
513 leukosis virus DNA. *J Virol*. 1986 Nov;60(2):497–505.
- 514 11. Kahle PJ, Neumann M, Ozmen L, Muller V, Jacobsen H, Schindzielorz A, et al. Subcellular  
515 localization of wild-type and Parkinson's disease-associated mutant alpha -synuclein in human and  
516 transgenic mouse brain. *J Neurosci Off J Soc Neurosci*. 2000 Sep 1;20(17):6365–73.
- 517 12. Specht CG, Tigaret CM, Rast GF, Thalhammer A, Rudhard Y, Schoepfer R. Subcellular localisation  
518 of recombinant alpha- and gamma-synuclein. *Mol Cell Neurosci*. 2005 Feb;28(2):326–34.
- 519 13. Jiang P, Gan M, Yen S-H, Moussaoud S, McLean PJ, Dickson DW. Proaggregant nuclear factor(s)  
520 trigger rapid formation of  $\alpha$ -synuclein aggregates in apoptotic neurons. *Acta Neuropathol (Berl)*.  
521 2016 Jul;132(1):77–91.
- 522 14. Chen V, Moncalvo M, Tringali D, Tagliafierro L, Shriskanda A, Ilich E, et al. The mechanistic role of  
523 alpha-synuclein in the nucleus: impaired nuclear function caused by familial Parkinson's disease  
524 SNCA mutations. *Hum Mol Genet*. 2020 Nov 4;29(18):3107–21.
- 525 15. Masliah E, Rockenstein E, Veinbergs I, Mallory M, Hashimoto M, Takeda A, et al. Dopaminergic  
526 Loss and Inclusion Body Formation in  $\alpha$ -Synuclein Mice: Implications for Neurodegenerative  
527 Disorders. *Science*. 2000 Feb 18;287(5456):1265–9.
- 528 16. Goers J, Manning-Bog AB, McCormack AL, Millett IS, Doniach S, Di Monte DA, et al. Nuclear  
529 localization of alpha-synuclein and its interaction with histones. *Biochemistry*. 2003 Jul  
530 22;42(28):8465–71.
- 531 17. Kontopoulos E, Parvin JD, Feany MB. Alpha-synuclein acts in the nucleus to inhibit histone  
532 acetylation and promote neurotoxicity. *Hum Mol Genet*. 2006 Oct 15;15(20):3012–23.
- 533 18. Huang Z, Xu Z, Wu Y, Zhou Y. DETERMINING NUCLEAR LOCALIZATION OF ALPHA-  
534 SYNUCLEIN IN MOUSE BRAINS. *Neuroscience*. 2011 Dec 29;199:318–32.

- 535 19. McLean PJ, Ribich S, Hyman BT. Subcellular localization of alpha-synuclein in primary neuronal  
536 cultures: effect of missense mutations. *J Neural Transm Suppl.* 2000;(58):53–63.
- 537 20. Pinho R, Paiva I, Jercic KG, Fonseca-Ornelas L, Gerhardt E, Fahlbusch C, et al. Nuclear  
538 localization and phosphorylation modulate pathological effects of alpha-synuclein. *Hum Mol Genet.*  
539 2019 01;28(1):31–50.
- 540 21. Ciron C, Zheng L, Bobela W, Knott GW, Leone TC, Kelly DP, et al. PGC-1 $\alpha$  activity in nigral  
541 dopamine neurons determines vulnerability to  $\alpha$ -synuclein. *Acta Neuropathol Commun* [Internet].  
542 2015 Apr 1 [cited 2019 Oct 22];3. Available from:  
543 <https://www.ncbi.nlm.nih.gov/pmc/articles/PMC4379693/>
- 544 22. Paiva I, Jain G, Lázaro DF, Jerčić KG, Hentrich T, Kerimoglu C, et al. Alpha-synuclein deregulates  
545 the expression of COL4A2 and impairs ER-Golgi function. *Neurobiol Dis.* 2018 Nov 1;119:121–35.
- 546 23. Schaser AJ, Osterberg VR, Dent SE, Stackhouse TL, Wakeham CM, Boutros SW, et al. Alpha-  
547 synuclein is a DNA binding protein that modulates DNA repair with implications for Lewy body  
548 disorders. *Sci Rep.* 2019 Jul 29;9(1):1–19.
- 549 24. Rousseaux MW, Revelli J-P, Vázquez-Vélez GE, Kim J-Y, Craigen E, Gonzales K, et al. Depleting  
550 Trim28 in adult mice is well tolerated and reduces levels of  $\alpha$ -synuclein and tau. Ackerman SL,  
551 editor. *eLife.* 2018 Jun 4;7:e36768.
- 552 25. Deacon RMJ. Assessing nest building in mice. *Nat Protoc.* 2006;1(3):1117–9.
- 553 26. Rousseaux MW, de Haro M, Lasagna-Reeves CA, De Maio A, Park J, Jafar-Nejad P, et al. TRIM28  
554 regulates the nuclear accumulation and toxicity of both alpha-synuclein and tau. Ackerman SL,  
555 editor. *eLife.* 2016 Oct 25;5:e19809.
- 556 27. Tokarew JM, El-Kodsi DN, Lengacher NA, Fehr TK, Nguyen AP, Shutinoski B, et al. Age-associated  
557 insolubility of parkin in human midbrain is linked to redox balance and sequestration of reactive  
558 dopamine metabolites. *Acta Neuropathol (Berl).* 2021 May;141(5):725–54.

- 559 28. Siddiqui MF, Rast S, Lynn MJ, Auchus AP, Pfeiffer RF. Autonomic dysfunction in Parkinson's  
560 disease: a comprehensive symptom survey. *Parkinsonism Relat Disord*. 2002 Mar;8(4):277–84.
- 561 29. Cheon S-M, Ha M-S, Park MJ, Kim JW. Nonmotor symptoms of Parkinson's disease: prevalence  
562 and awareness of patients and families. *Parkinsonism Relat Disord*. 2008;14(4):286–90.
- 563 30. Baba M, Nakajo S, Tu PH, Tomita T, Nakaya K, Lee VM, et al. Aggregation of alpha-synuclein in  
564 Lewy bodies of sporadic Parkinson's disease and dementia with Lewy bodies. *Am J Pathol*. 1998  
565 Apr;152(4):879–84.
- 566 31. Braak H, Tredici KD, Rüb U, de Vos RAI, Jansen Steur ENH, Braak E. Staging of brain pathology  
567 related to sporadic Parkinson's disease. *Neurobiol Aging*. 2003 Mar 1;24(2):197–211.
- 568 32. Luk KC, Kehm VM, Zhang B, O'Brien P, Trojanowski JQ, Lee VMY. Intracerebral inoculation of  
569 pathological  $\alpha$ -synuclein initiates a rapidly progressive neurodegenerative  $\alpha$ -synucleinopathy in  
570 mice. *J Exp Med*. 2012 May 7;209(5):975–86.
- 571 33. Luk KC, Kehm V, Carroll J, Zhang B, O'Brien P, Trojanowski JQ, et al. Pathological  $\alpha$ -Synuclein  
572 Transmission Initiates Parkinson-like Neurodegeneration in Non-transgenic Mice. *Science*. 2012  
573 Nov 16;338(6109):949–53.
- 574 34. Chesselet M-F, Richter F, Zhu C, Magen I, Watson MB, Subramaniam SR. A Progressive Mouse  
575 Model of Parkinson's Disease: The Thy1-aSyn ("Line 61") Mice. *Neurotherapeutics*. 2012  
576 Apr;9(2):297–314.
- 577 35. Cabin DE, Shimazu K, Murphy D, Cole NB, Gottschalk W, McIlwain KL, et al. Synaptic vesicle  
578 depletion correlates with attenuated synaptic responses to prolonged repetitive stimulation in mice  
579 lacking alpha-synuclein. *J Neurosci Off J Soc Neurosci*. 2002 Oct 15;22(20):8797–807.
- 580 36. Taguchi K, Watanabe Y, Tsujimura A, Tanaka M. Expression of  $\alpha$ -synuclein is regulated in a  
581 neuronal cell type-dependent manner. *Anat Sci Int*. 2019 Jan;94(1):11–22.

- 582 37. Halliday GM, Holton JL, Revesz T, Dickson DW. Neuropathology underlying clinical variability in  
583 patients with synucleinopathies. *Acta Neuropathol (Berl)*. 2011 Aug;122(2):187–204.
- 584 38. Giguère N, Burke Nanni S, Trudeau L-E. On Cell Loss and Selective Vulnerability of Neuronal  
585 Populations in Parkinson’s Disease. *Front Neurol*. 2018;9:455.
- 586 39. Foffani G, Obeso JA. A Cortical Pathogenic Theory of Parkinson’s Disease. *Neuron*. 2018 Sep  
587 19;99(6):1116–28.
- 588 40. Niccolini F, Foltynie T, Reis Marques T, Muhlert N, Tziortzi AC, Searle GE, et al. Loss of  
589 phosphodiesterase 10A expression is associated with progression and severity in Parkinson’s  
590 disease. *Brain J Neurol*. 2015 Oct;138(Pt 10):3003–15.
- 591 41. Halbgebauer S, Nagl M, Klafki H, Haußmann U, Steinacker P, Oeckl P, et al. Modified serpinA1 as  
592 risk marker for Parkinson’s disease dementia: Analysis of baseline data. *Sci Rep*. 2016 May  
593 17;6(1):26145.
- 594 42. Benkert J, Hess S, Roy S, Beccano-Kelly D, Wiederspohn N, Duda J, et al. Cav2.3 channels  
595 contribute to dopaminergic neuron loss in a model of Parkinson’s disease. *Nat Commun*. 2019 Nov  
596 8;10:5094.
- 597 43. Date I, Notter MFD, Felten SY, Felten DL. MPTP-treated young mice but not aging mice show  
598 partial recovery of the nigrostriatal dopaminergic system by stereotaxic injection of acidic fibroblast  
599 growth factor (aFGF). *Brain Res*. 1990 Aug 27;526(1):156–60.
- 600 44. Nishi A, Shuto T. Potential for targeting dopamine/DARPP-32 signaling in neuropsychiatric and  
601 neurodegenerative disorders. *Expert Opin Ther Targets*. 2017 Mar 4;21(3):259–72.
- 602 45. Schwarzschild MA, Agnati L, Fuxe K, Chen J-F, Morelli M. Targeting adenosine A2A receptors in  
603 Parkinson’s disease. *Trends Neurosci*. 2006 Nov;29(11):647–54.

- 604 46. Schwindinger WF, Mihalcik LJM, Giger KE, Betz KS, Stauffer AM, Linden J, et al. Adenosine A2A  
605 Receptor Signaling and Golf Assembly Show a Specific Requirement for the  $\gamma 7$  Subtype in the  
606 Striatum. *J Biol Chem*. 2010 Sep 24;285(39):29787–96.
- 607 47. Torres ERS, Stanojlovic M, Zelikowsky M, Bonsberger J, Hean S, Mulligan C, et al. Alpha-synuclein  
608 pathology, microgliosis, and parvalbumin neuron loss in the amygdala associated with enhanced  
609 fear in the Thy1-aSyn model of Parkinson's disease. *Neurobiol Dis*. 2021 Oct;158:105478.
- 610 48. Jiang P, Gan M, Yen S-H, McLean PJ, Dickson DW. Histones facilitate  $\alpha$ -synuclein aggregation  
611 during neuronal apoptosis. *Acta Neuropathol (Berl)*. 2017 Apr;133(4):547–58.
- 612 49. Ma S-X, Seo BA, Kim D, Xiong Y, Kwon S-H, Brahmachari S, et al. Complement and Coagulation  
613 Cascades are Potentially Involved in Dopaminergic Neurodegeneration in  $\alpha$ -Synuclein-Based  
614 Mouse Models of Parkinson's Disease. *J Proteome Res*. 2021 Jul 2;20(7):3428–43.
- 615 50. Flores-Cuadrado A, Ubeda-Bañón I, Saiz-Sanchez D, Martinez-Marcos A.  $\alpha$ -Synucleinopathy in the  
616 Human Amygdala in Parkinson Disease: Differential Vulnerability of Somatostatin- and  
617 Parvalbumin-Expressing Neurons. *J Neuropathol Exp Neurol*. 2017 Sep 1;76(9):754–8.
- 618 51. Sasaki K, Yamasaki T, Omotuyi IO, Mishina M, Ueda H. Age-dependent dystonia in striatal Gy7  
619 deficient mice is reversed by the dopamine D2 receptor agonist pramipexole. *J Neurochem*.  
620 2013;124(6):844–54.
- 621 52. Abeliovich A, Schmitz Y, Fariñas I, Choi-Lundberg D, Ho WH, Castillo PE, et al. Mice lacking alpha-  
622 synuclein display functional deficits in the nigrostriatal dopamine system. *Neuron*. 2000  
623 Jan;25(1):239–52.
- 624 53. Greten-Harrison B, Polydoro M, Morimoto-Tomita M, Diao L, Williams AM, Nie EH, et al.  $\alpha\beta\gamma$ -  
625 Synuclein triple knockout mice reveal age-dependent neuronal dysfunction. *Proc Natl Acad Sci U S*  
626 A. 2010 Nov 9;107(45):19573–8.



- 627 54. Burré J, Sharma M, Tsetsenis T, Buchman V, Etherton MR, Südhof TC.  $\alpha$ -Synuclein Promotes  
628 SNARE-Complex Assembly in Vivo and in Vitro. *Science*. 2010 Sep 24;329(5999):1663–7.
- 629 55. Anwar S, Peters O, Millership S, Ninkina N, Doig N, Connor-Robson N, et al. Functional alterations  
630 to the nigrostriatal system in mice lacking all three members of the synuclein family. *J Neurosci Off*  
631 *J Soc Neurosci*. 2011 May 18;31(20):7264–74.
- 632 56. Timney BL, Raveh B, Mironska R, Trivedi JM, Kim SJ, Russel D, et al. Simple rules for passive  
633 diffusion through the nuclear pore complex. *J Cell Biol*. 2016 Oct 10;215(1):57–76.
- 634 57. Siddiqui A, Chinta SJ, Mallajosyula JK, Rajagopalan S, Hanson I, Rane A, et al. Selective binding of  
635 nuclear alpha-synuclein to the PGC1alpha promoter under conditions of oxidative stress may  
636 contribute to losses in mitochondrial function: implications for Parkinson's disease. *Free Radic Biol*  
637 *Med*. 2012 Aug 15;53(4):993–1003.
- 638 58. Jiang K, Rocha S, Westling A, Kesarimangalam S, Dorfman KD, Wittung-Stafshede P, et al. Alpha-  
639 Synuclein Modulates the Physical Properties of DNA. *Chem Weinh Bergstr Ger*. 2018 Oct  
640 17;24(58):15685–90.
- 641 59. Vasudevaraju P, Guerrero E, Hegde ML, Collen TB, Britton GB, Rao KS. New evidence on  $\alpha$ -  
642 synuclein and Tau binding to conformation and sequence specific GC\* rich DNA: Relevance to  
643 neurological disorders. *J Pharm Bioallied Sci*. 2012;4(2):112–7.
- 644 60. Ma K-L, Song L-K, Yuan Y-H, Zhang Y, Yang J-L, Zhu P, et al.  $\alpha$ -Synuclein is Prone to Interaction  
645 with the GC-Box-Like Sequence In Vitro. *Cell Mol Neurobiol*. 2014 May 1;34(4):603–9.
- 646
- 647

648 *Figures, tables, additional files*

649 **Figure 1: *Snca*<sup>NLS</sup> mice effectively target  $\alpha$ Syn to the nucleus in vitro and in vivo.** A) *Snca*<sup>NLS-Flag</sup>

650 knock-in scheme with C-terminal NLS-Flag tag. Visualization of the knockin via (B) PCR and (C) western

651 blot. D) Illustration of nuclear localization of  $\alpha$ Syn (upper left) with protein quantification (lower left) of

652 nuclear  $\alpha$ Syn from primary cortical neurons in wildtype (top right panels), *Snca*<sup>NLS/+</sup> (middle right panels),

653 and *Snca*<sup>NLS/NLS</sup> (bottom right panels) (n=3). White arrows denote presynaptic  $\alpha$ Syn and nuclei circled in

654 white E) Localization of  $\alpha$ Syn in wild-type (top panels) and *Snca*<sup>NLS/NLS</sup> (bottom panels) in the cortex,

655 hippocampus, and SNc. One-way ANOVA with Bonferroni multiple comparison: \*\* denotes p<0.01.

656 **Figure 2: *Snca*<sup>NLS</sup> mice exhibit significant motor and gastrointestinal dysfunction.** Analysis of the 3-

657 (top) and 9-month (bottom) mice for (A) Beam Break, (B) Rotarod, and (C) Adhesive Removal measuring

658 time to contact their forepaws, (D) Fecal Pellet Weight measuring fecal weight and water content over 1

659 hour, and (E) Fecal Pellet Output measuring fecal pellets produced in 10 minutes, (n=10-21). F) Survival

660 curve from all mice in the behaviour colony (n=32-58). One-Way (C,E) or Two-Way ANOVA (A,B,D) with

661 Bonferroni multiple comparison or Log-rank (Mantel Cox) test (F): ns, \*, \*\*, \*\*\*, and \*\*\*\* denotes p>0.05,

662 <0.05, <0.01, <0.001, and <0.0001, respectively.

663 **Figure 3: *Snca*<sup>NLS/NLS</sup> mice do not display significant changes in aggregated or phosphorylated**

664  **$\alpha$ Syn.** Serial extraction of cortical mouse brain tissue with western blot probed for (A)  $\alpha$ Syn (upper blot)

665 and pS129- $\alpha$ Syn (middle blot) and Gapdh (bottom blot) comparing the level of  $\alpha$ Syn in the (B) TSS

666 (upper) and TXS (lower) fraction (n=4). C) qPCR of *Snca* mRNA from 9-month mouse cortex. D) pS129-

667  $\alpha$ Syn staining of the motor cortex (upper) and hippocampus (lower). One-Way ANOVA with Bonferroni

668 multiple comparison: ns, \*, \*\*, and \*\*\* denotes p>0.05, <0.05, <0.01, and <0.001, respectively.

669 **Figure 4: 18-month-old *Snca*<sup>NLS/NLS</sup> mice exhibit cortical thinning and pyknotic cells in the cortex**

670 **independent of dopaminergic neurodegeneration.** Tyrosine hydroxylase staining of the (A) Substantia

671 nigra *pars compacta* and (B) striatum of 18-month mice (n=7). C) HPLC of 18-month striatal tissue

672 measuring Dopamine (left), DOPAC (middle left), HVA (middle right), and 5-HIAA (right) (n=5-7). D) H&E

673 staining with quantification of the motor cortex thickness (n=7-9). E) Toluidine blue staining with

674 quantification of pyknotic cells from the motor cortex (n=7-9). White arrows denote select pyknotic cells.

675 One-Way with Bonferroni multiple comparison: ns, \*\* denotes p>0.05, <0.01, respectively.

676 **Figure 5: Mass Spectrometry reveals proteomic alterations in the *Snca*<sup>NLS/NLS</sup> mice.** A) Mass  
677 spectrometry scheme for quantitative comparison of proteome between 9-month wildtype and *Snca*<sup>NLS/NLS</sup>  
678 mice (n=5). B) Heat map of all proteins identified through mass spectrometry with values within  $\pm 1$  Log<sub>2</sub>  
679 fold change. C) Table of enriched gene ontology pathways among the  $\pm 1$  Log<sub>2</sub> fold change hits. D)  
680 Volcano plot of mass spectrometry results with  $\pm 1$  Log<sub>2</sub> fold change highlighting significantly upregulated  
681 proteins in red and downregulated in blue. E) Western blot of cortical mouse brain tissue from 9-month  
682 mice probing for Darpp-32 (upper) and Gapdh (lower) with quantification (right). One-Way ANOVA with  
683 Bonferroni multiple comparison: ns denotes p>0.05.

684 **Supplementary Figure 1: Generation of the *Snca*<sup>NLS-Flag</sup> mice.** A) *Snca*<sup>NLS-Flag</sup> mouse generation. B)  
685 Sequencing confirms the presence of the knock-in. C) Breeding scheme with expected and actual  
686 Mendelian ratios among offspring. n=148 *Snca*<sup>+/+</sup>, n=272 *Snca*<sup>NLS/+</sup>, and n=147 *Snca*<sup>NLS/NLS</sup>.

687 **Supplementary Figure 2: Wild-type mice exhibit age-dependent decline in motor ability.** Behavior  
688 comparison of wild-type mice at 3-, 9-, and 18-months in (A) Open Field, (B) Nesting, (C) Pole test  
689 measuring time to turn over (left) and time to descend to the bottom (right), (D) Digigait measuring stride  
690 length (left) and stance width (right), and (E) Y maze (n=14-20). Motor assays with additional cohorts of  
691 mice include (F) Rotarod and (G) Adhesive removal measuring time to contact their forepaws (n=9-20).  
692 One- (A,B,C,E,G) or Two-Way ANOVA (D,F): ns, \*, \*\*, \*\*\*, and \*\*\*\* denotes p>0.05, <0.05, <0.01, <0.001,  
693 and <0.0001, respectively. Blue asterisk denotes significance between 3- and 9-month mice, black  
694 asterisk denotes significance between 9- and 18-month mice, and red asterisk denotes significance  
695 between 3- and 18-month mice.

696 **Supplementary Figure 3: Comprehensive behavior and dopaminergic profiling of young**  
697 ***Snca*<sup>NLS/NLS</sup> mice reveals little-to-no phenotypes.** Behavior analysis of 3-month mice in (A) Open Field,  
698 (B) Nesting, (C) Pole test measuring time to turn over (upper) and time to descend to the bottom (lower),  
699 and (D) DigiGait measuring stride length (left) and stance width (right) (n=14-21). E) Tyrosine hydroxylase  
700 staining of the Substantia nigra *pars compacta* (upper) and striatum (lower) of 2-month mice with their  
701 respective quantifications (right) (n=6-11). One-Way ANOVA (A,B,C,E) or Two-Way ANOVA (D): ns, \*  
702 denotes p>0.05, <0.05, respectively.

703 **Supplementary Figure 4: Comprehensive behavior profiling of 9-months-old *Snca*<sup>NLS/NLS</sup> mice**  
704 **compared to littermates.** Behavior analysis of 9-month mice in motor assays including (A) Open Field,  
705 (B) Nesting, (C) Pole test measuring time to turn over (left) and time to descend to the bottom (right), and  
706 (D) DigiGait measuring stride length (left) and stance width (right). Non-motor assays include (E) Fear  
707 conditioning, (F) Y maze forced alteration, and (G) Fecal pellet production measuring fecal output in 10  
708 minutes (left) and the weight and water content of fecal pellets produced over 1 hour (right) (n=14-21).  
709 One-Way ANOVA (A,B,C,E,F,G left) or Two-Way ANOVA (D,G right): ns, \* denotes p>0.05, <0.05,  
710 respectively.

711 **Supplementary Figure 5: Comprehensive behavior profiling of 18-months-old *Snca*<sup>NLS/NLS</sup> mice**  
712 **compared to littermates.** Behavior analysis of 18-month mice in motor assays including (A) Open Field,  
713 (B) Nesting, (C) Pole test measuring time to turn over (left) and time to descend to the bottom (right), and  
714 (D) Digigait measuring stride length (left) and stance width (right). Non-motor assays include (E) Fear  
715 conditioning and (F) Y maze (n=14-18). Motor assays with additional cohorts of mice include (G) Beam  
716 Break, (H) Rotarod, and (I) Adhesive removal measuring time to contact their forepaws (n=20-31). One-  
717 Way ANOVA (A,B,C,E,F,I) or Two-Way ANOVA (D,G,H): ns, \* denotes p>0.05, <0.05, respectively.

718 **Supplementary Table 1: List of antibodies used throughout the study**

719 **Supplementary Table 2: List of hits from proteomic profiling of cortices from 9-month-old**

720 ***Snca*<sup>NLS/NLS</sup> mice compared to wild-type littermates**

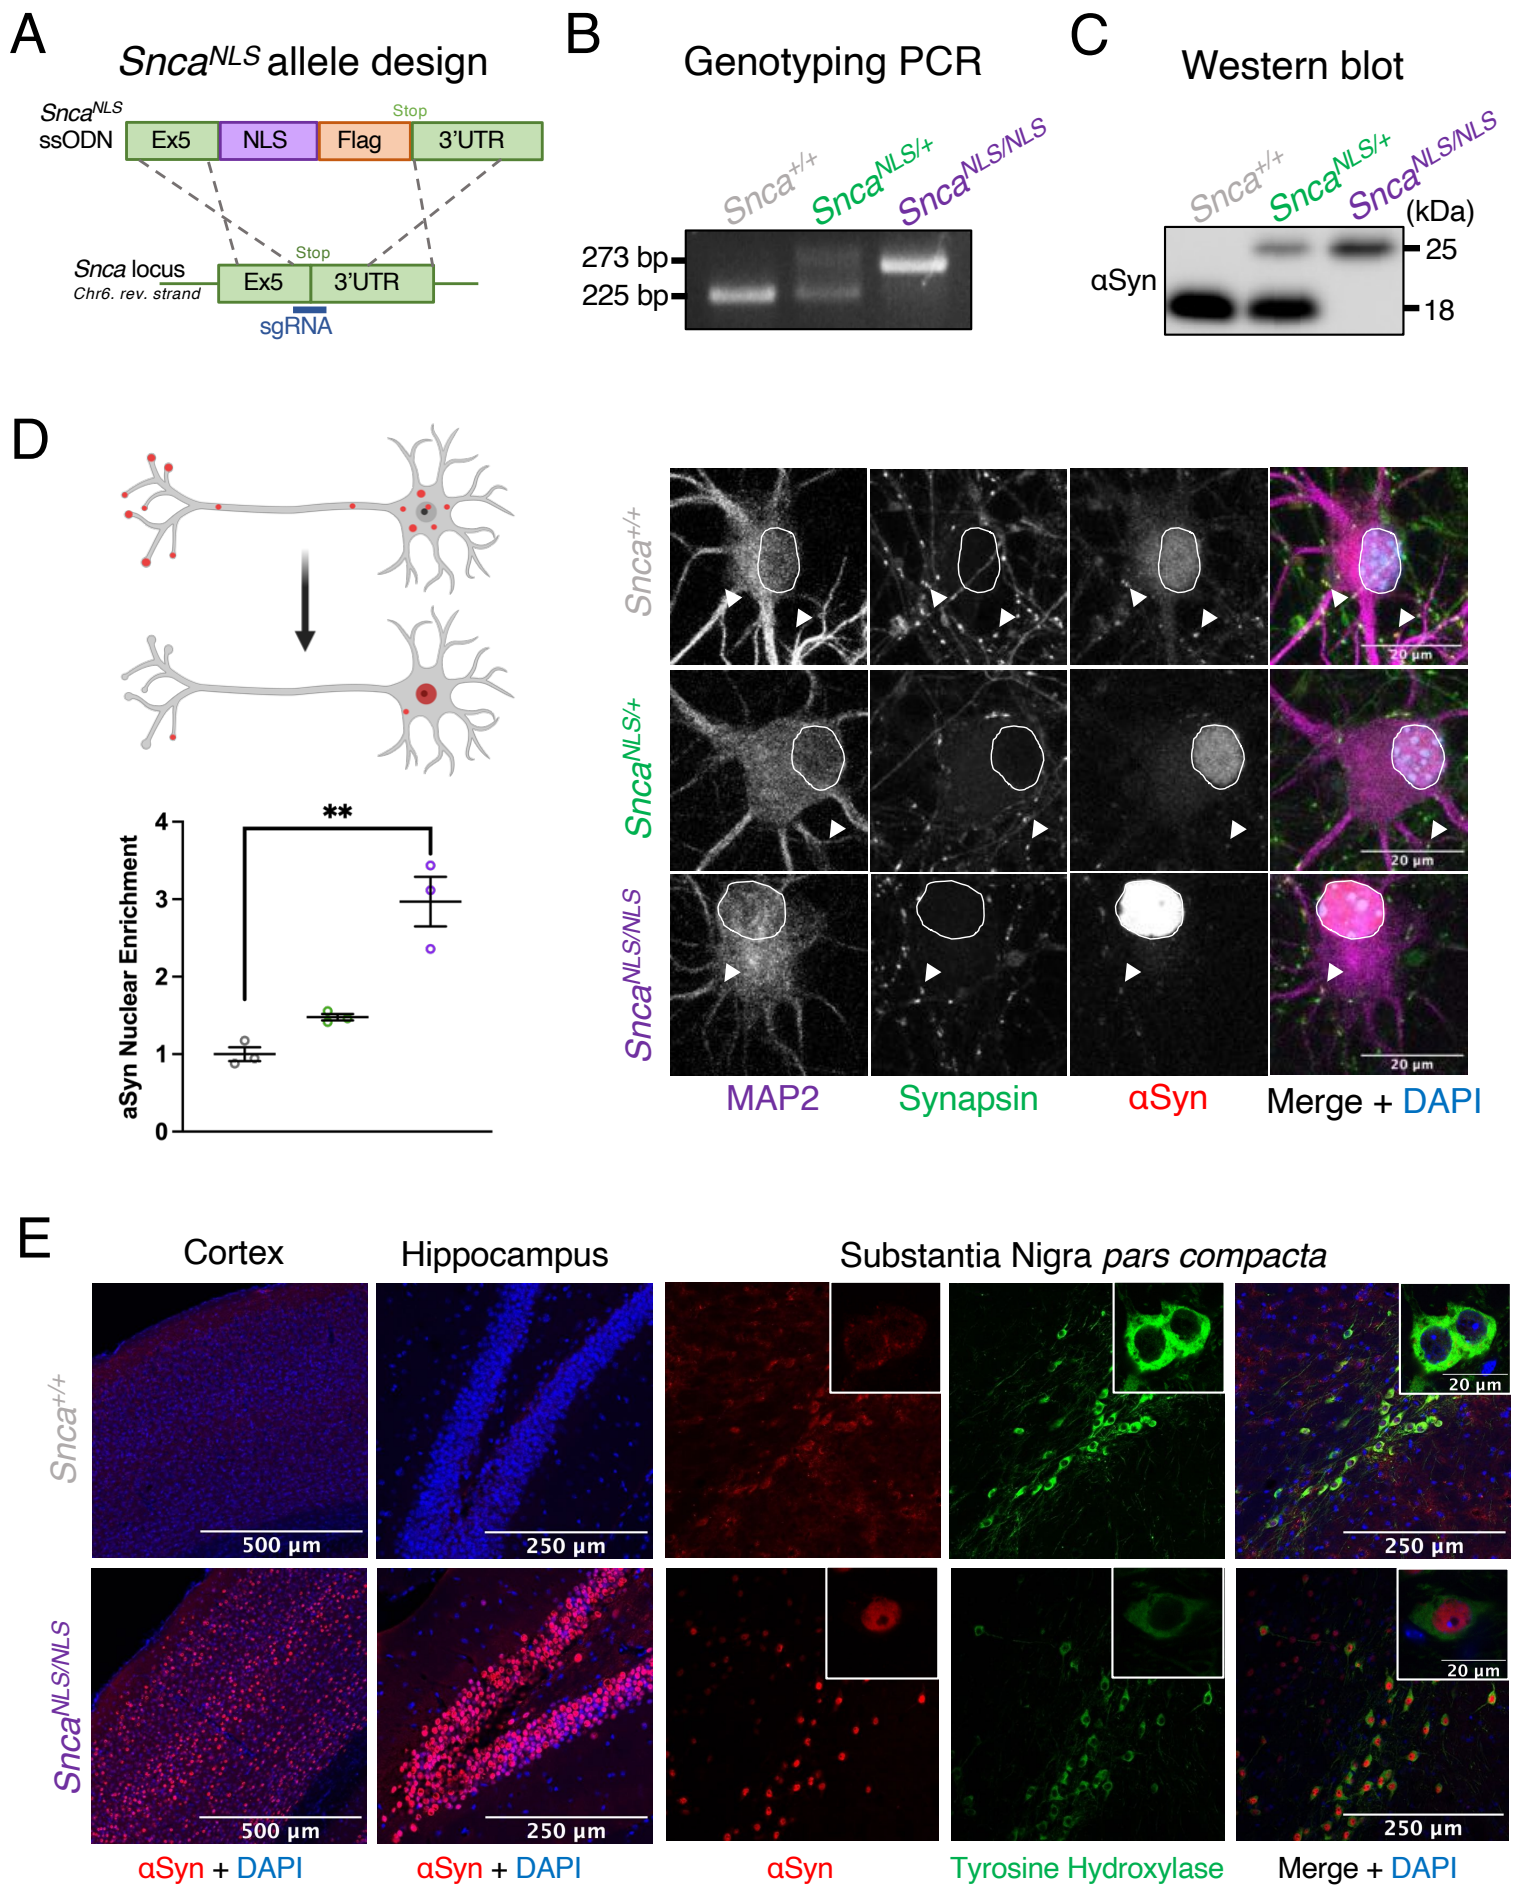

Figure 1

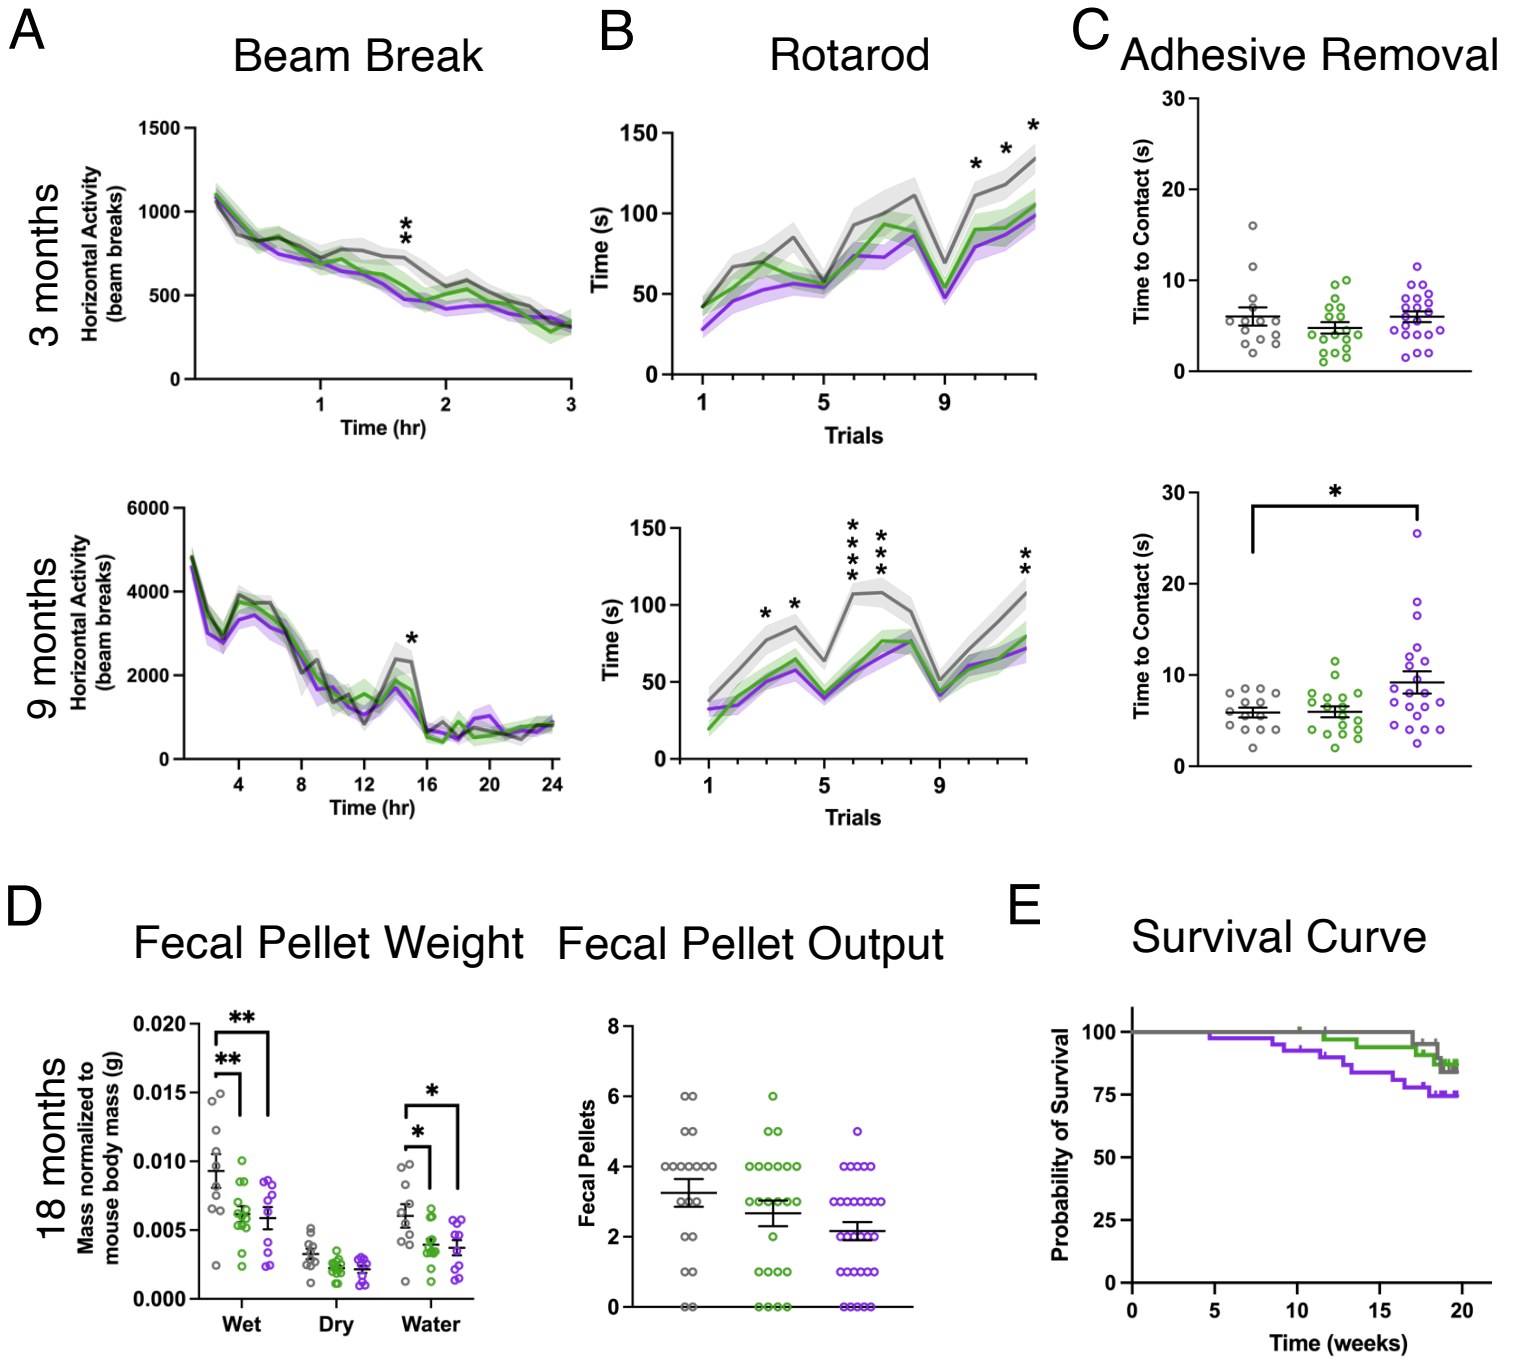

Figure 2

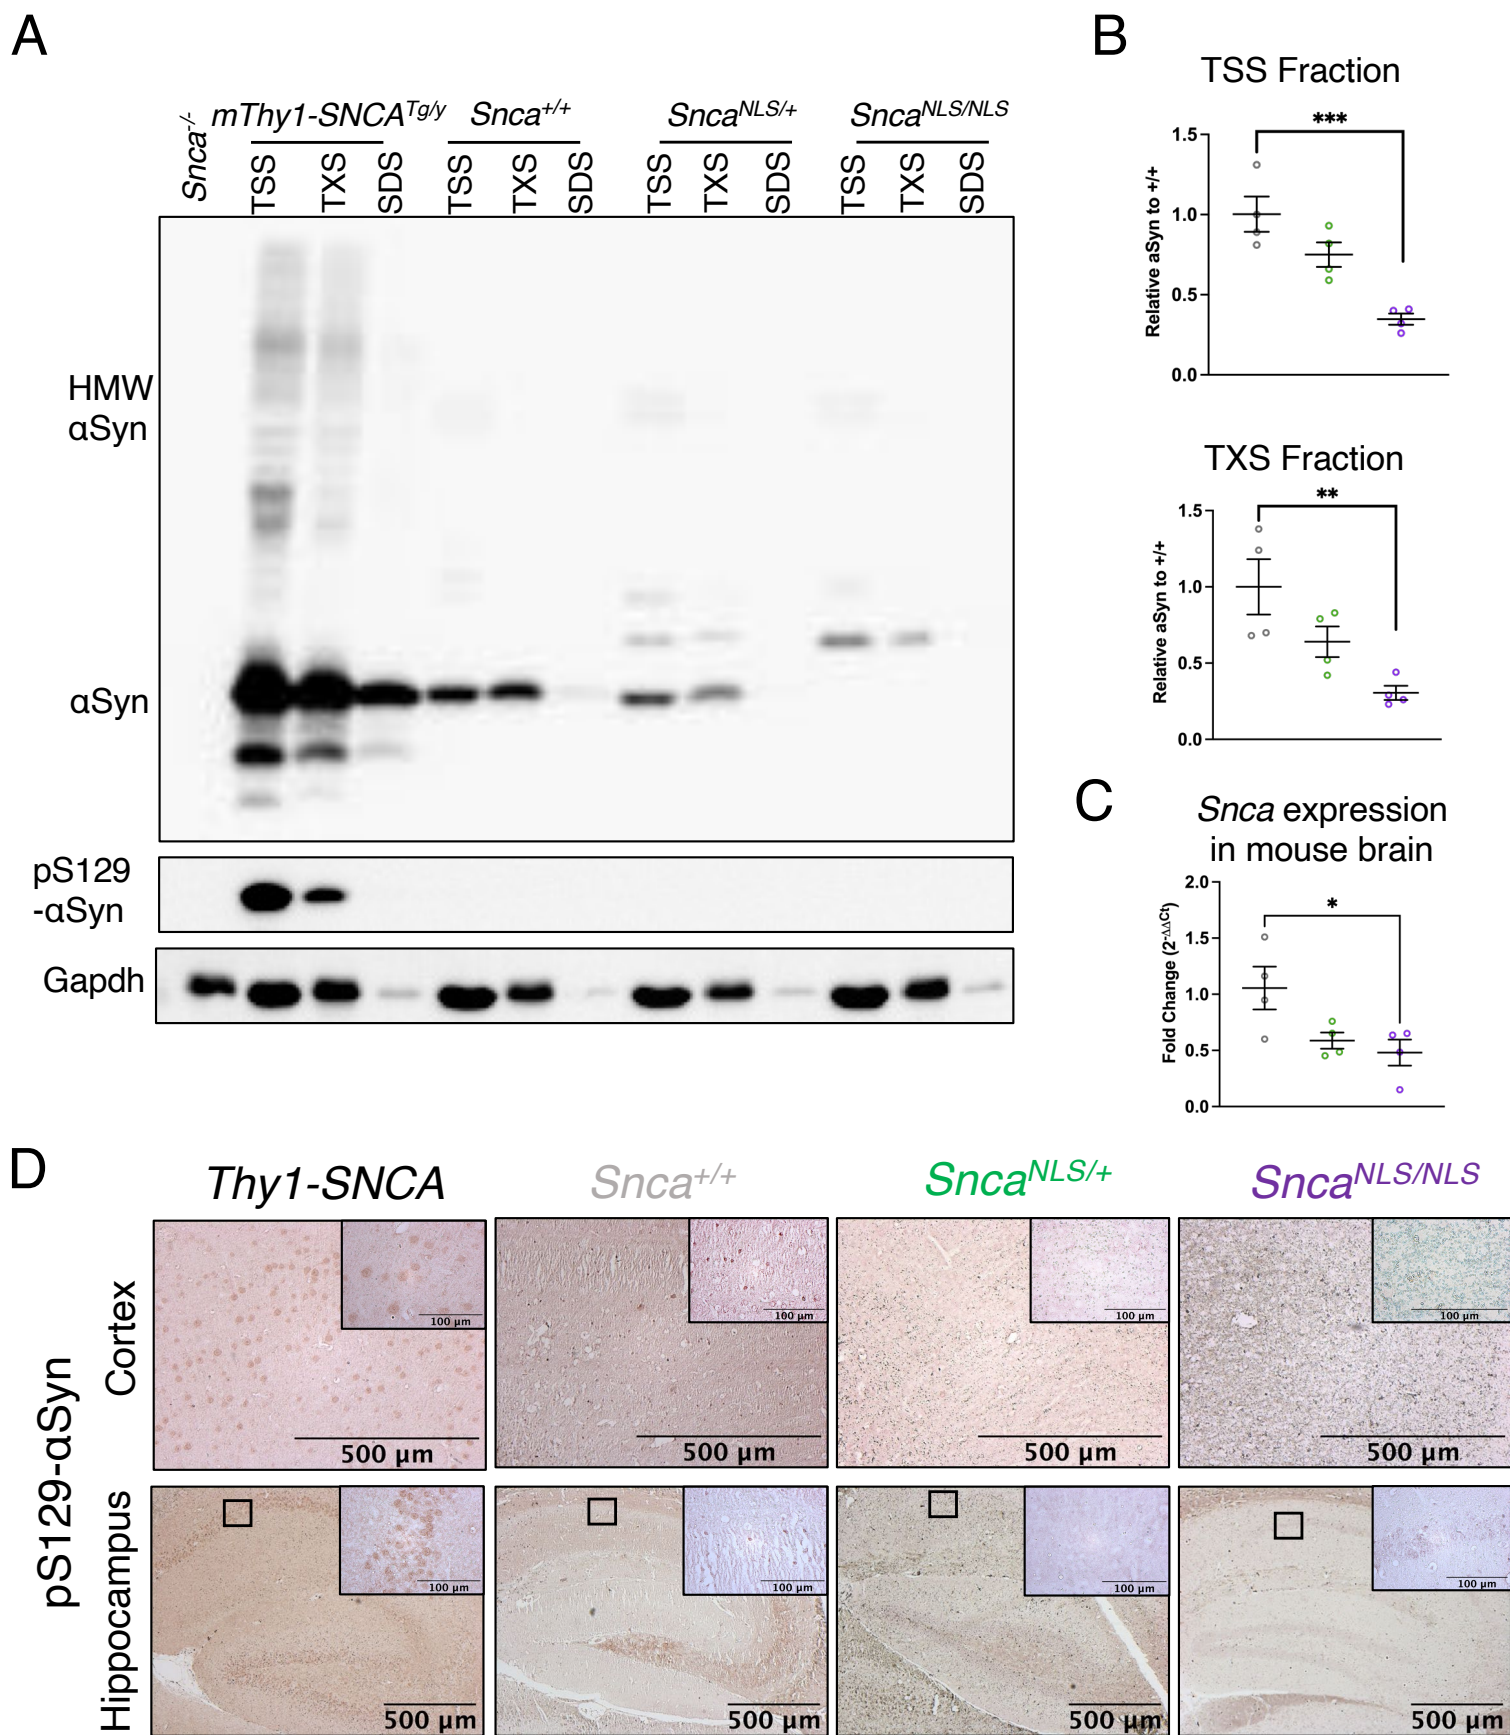

Figure 3

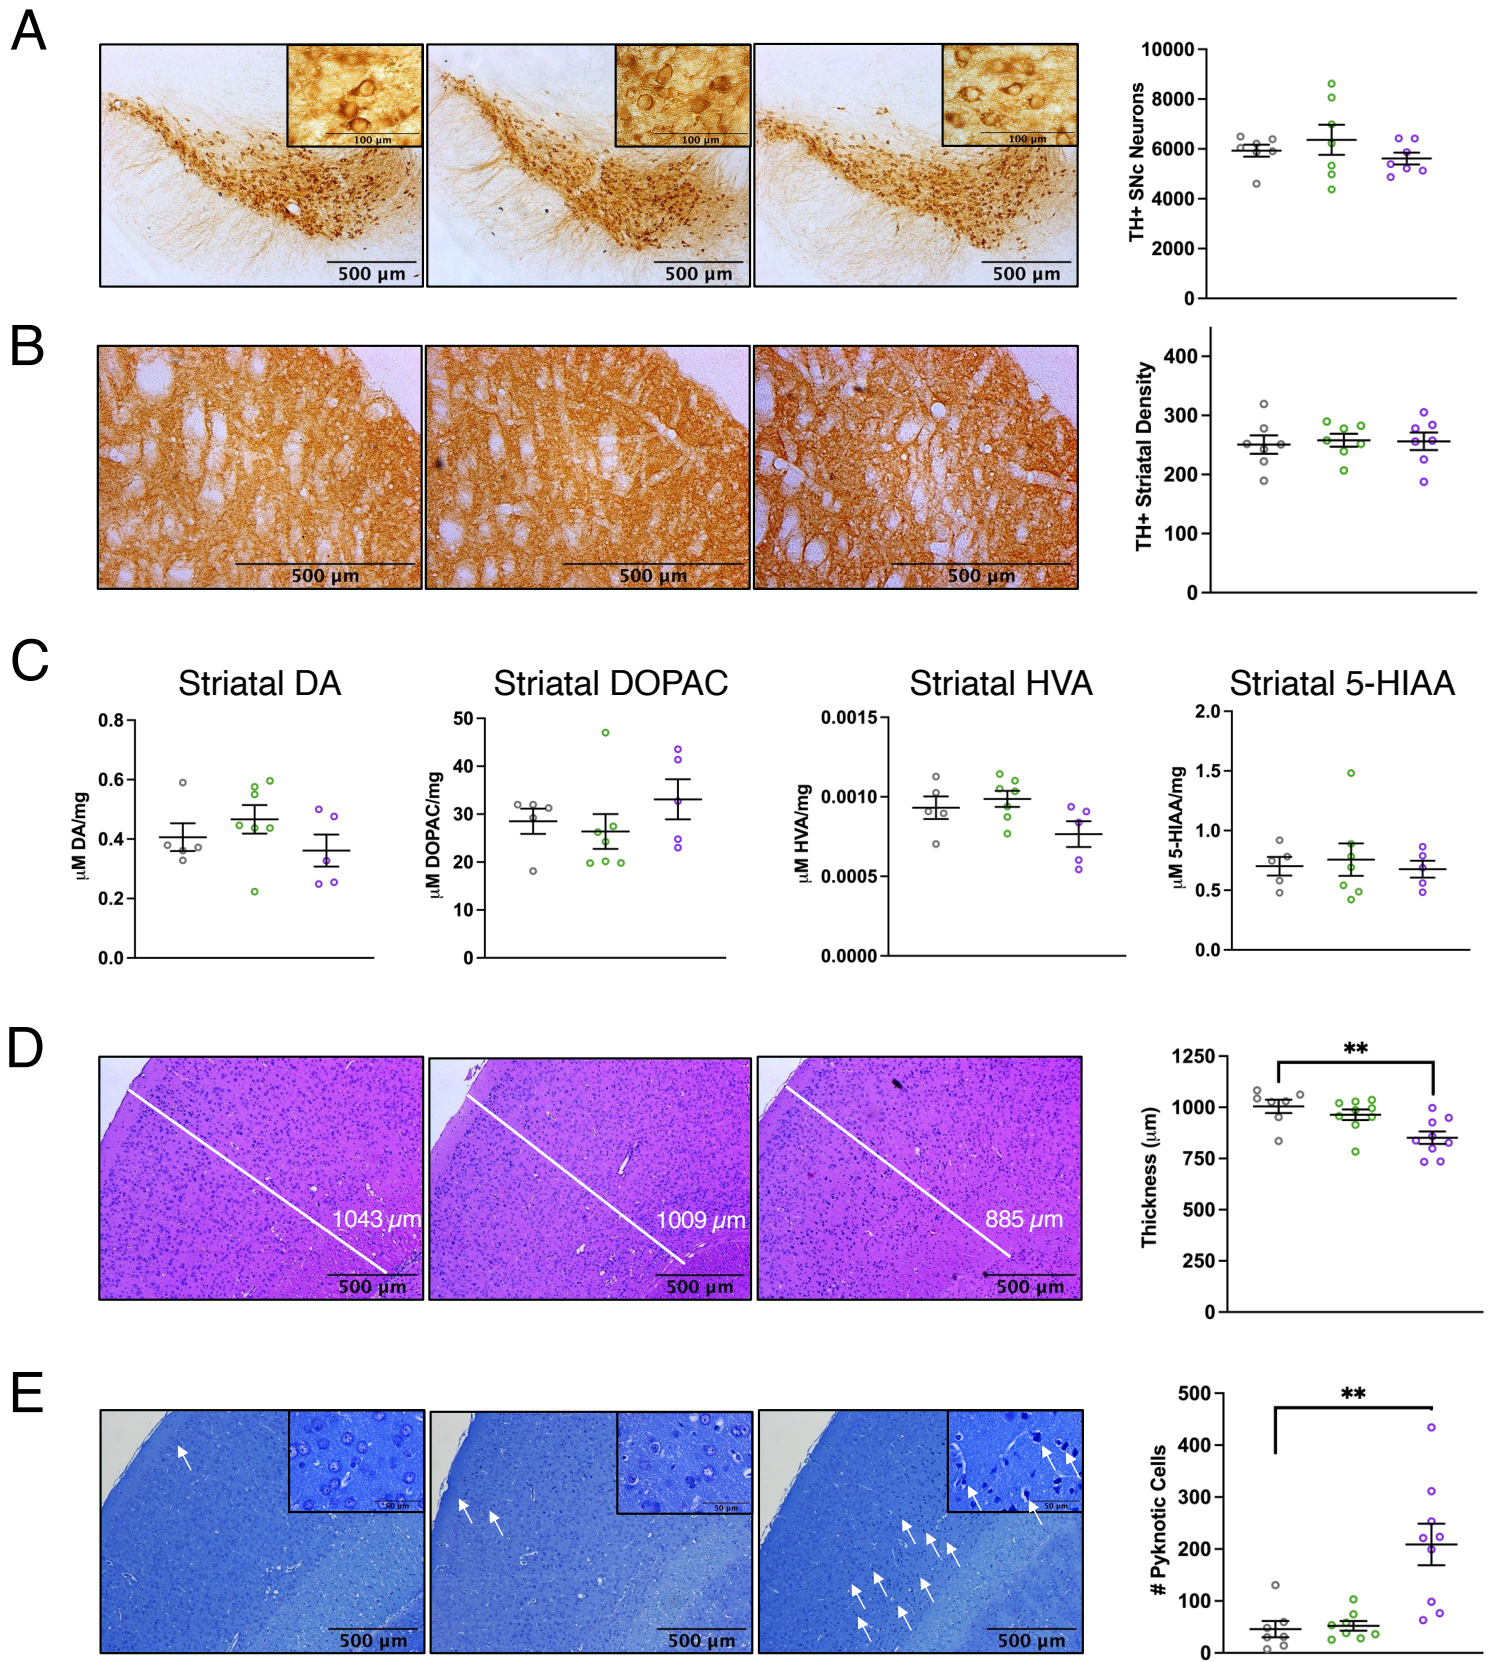

Figure 4



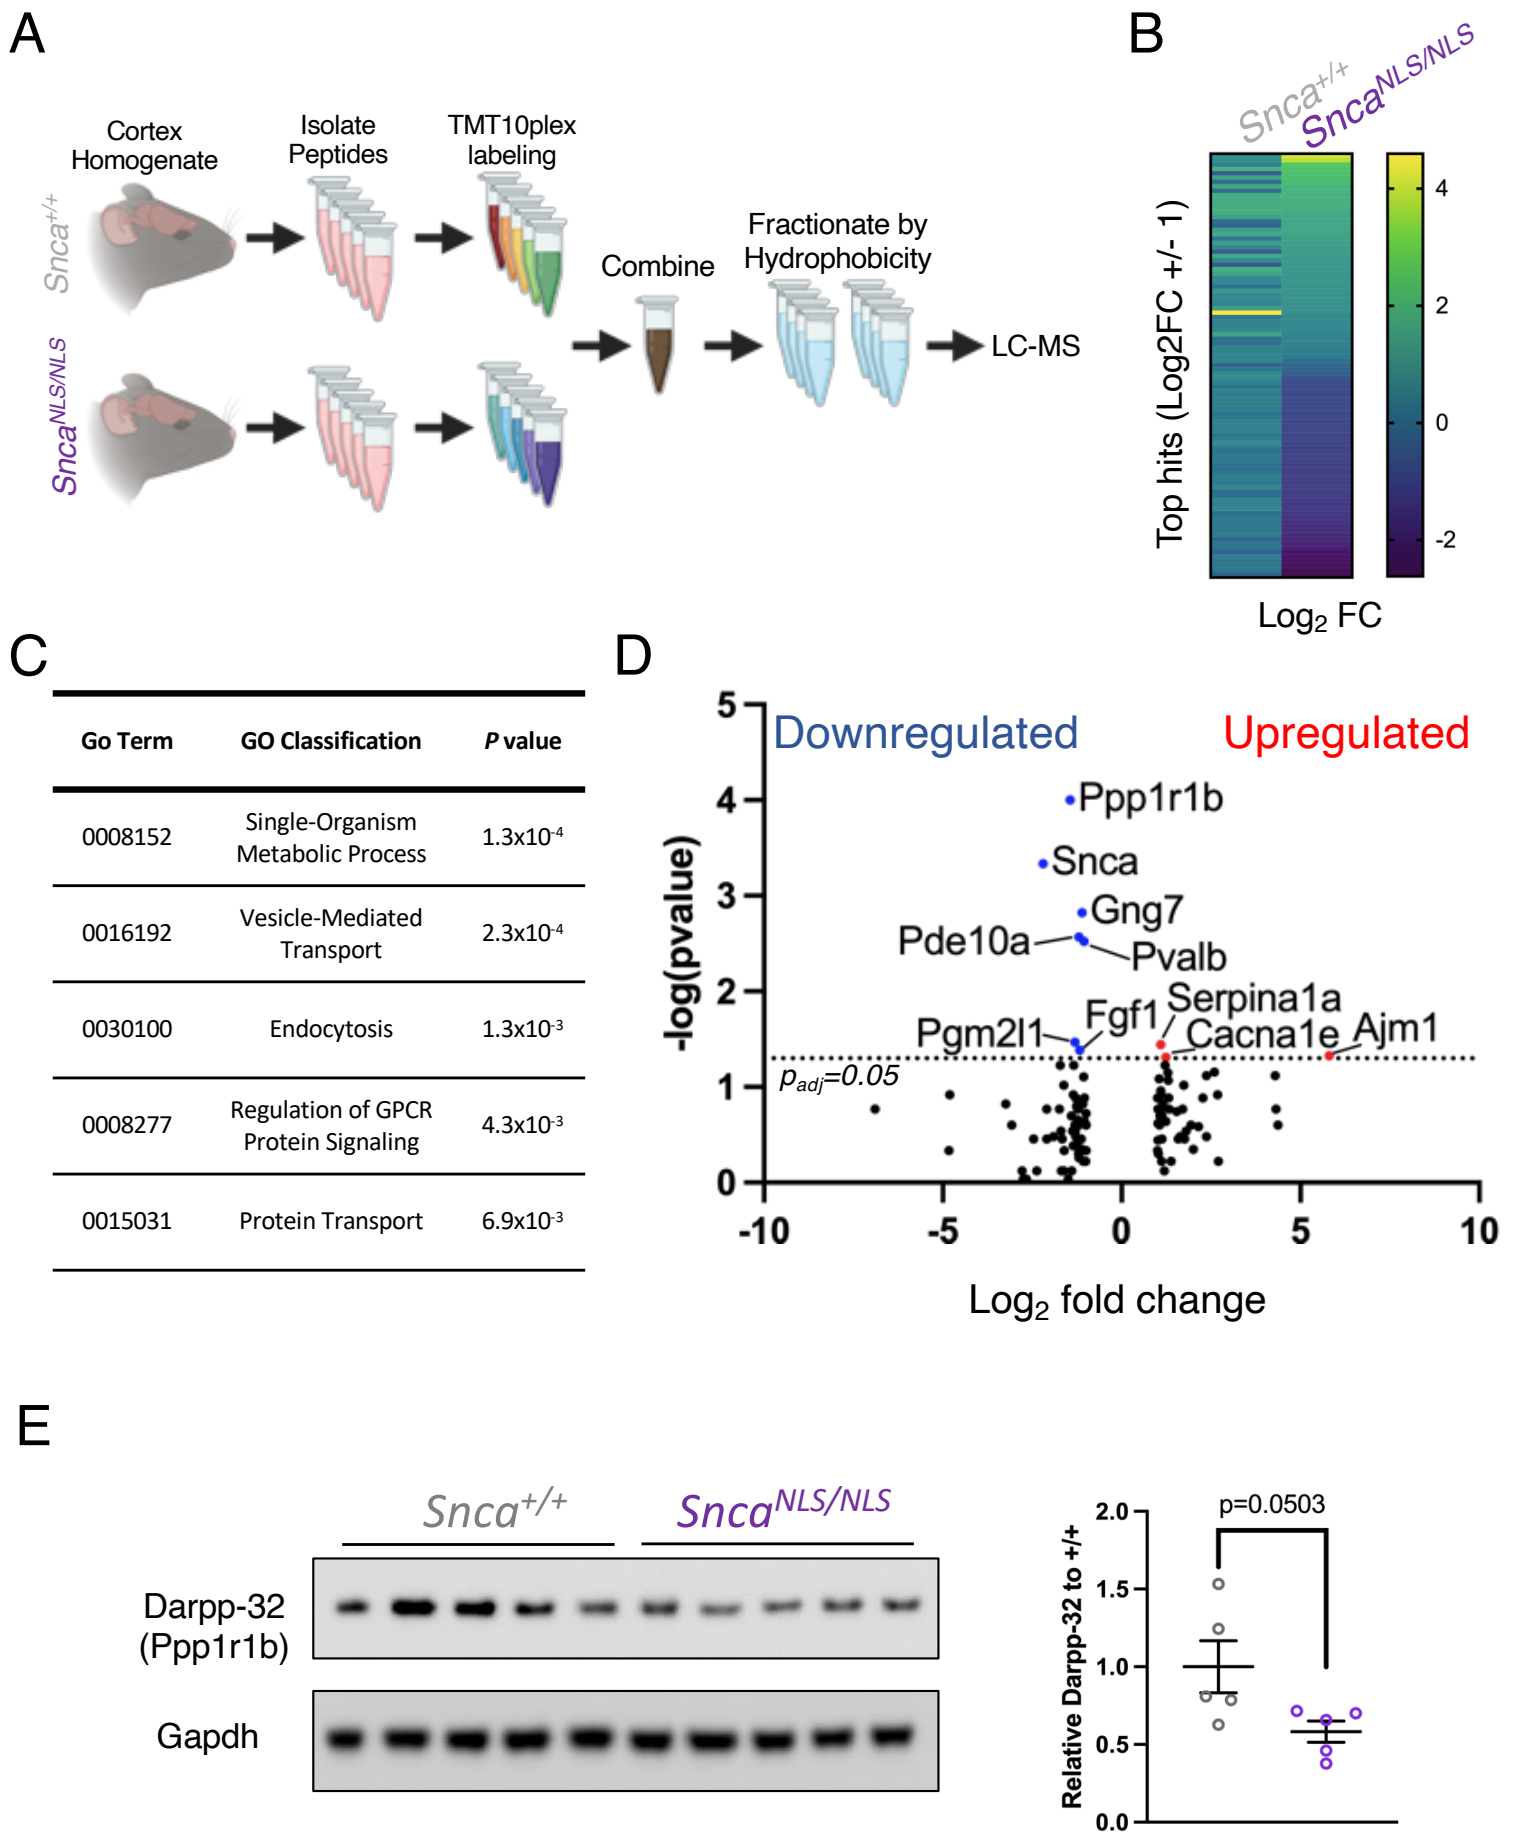

Figure 5

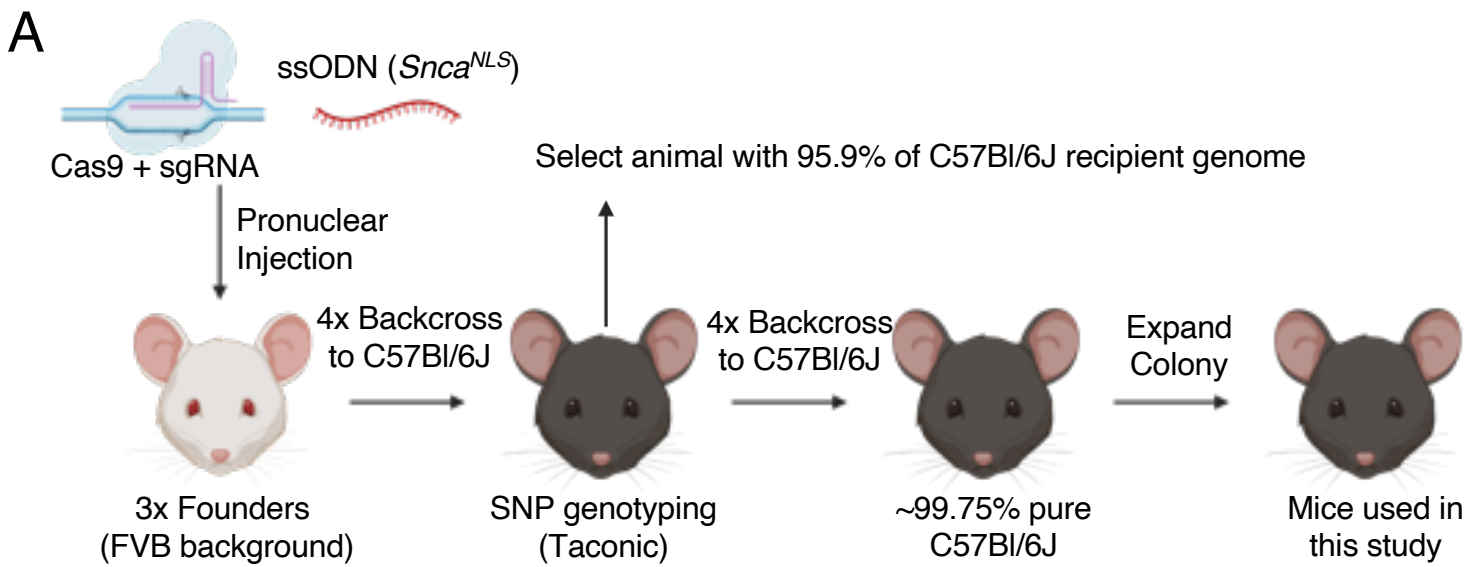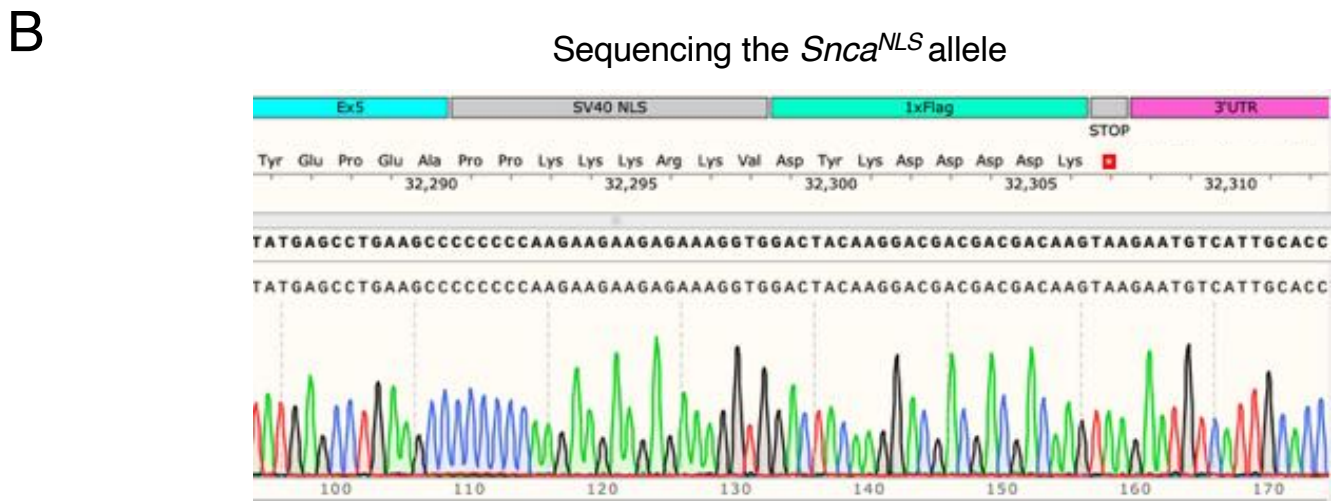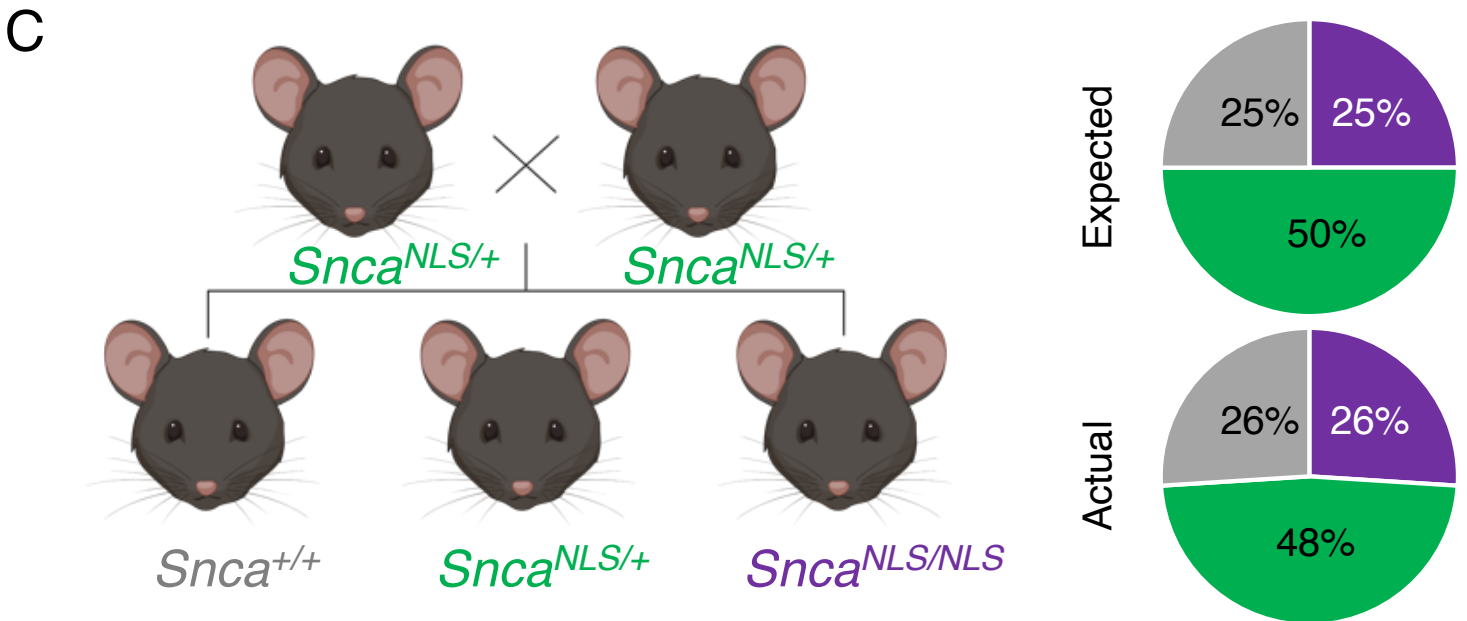

○ 3-Month *Snca*<sup>+/+</sup>

□ 9-Month *Snca*<sup>+/+</sup>

△ 18-Month *Snca*<sup>+/+</sup>

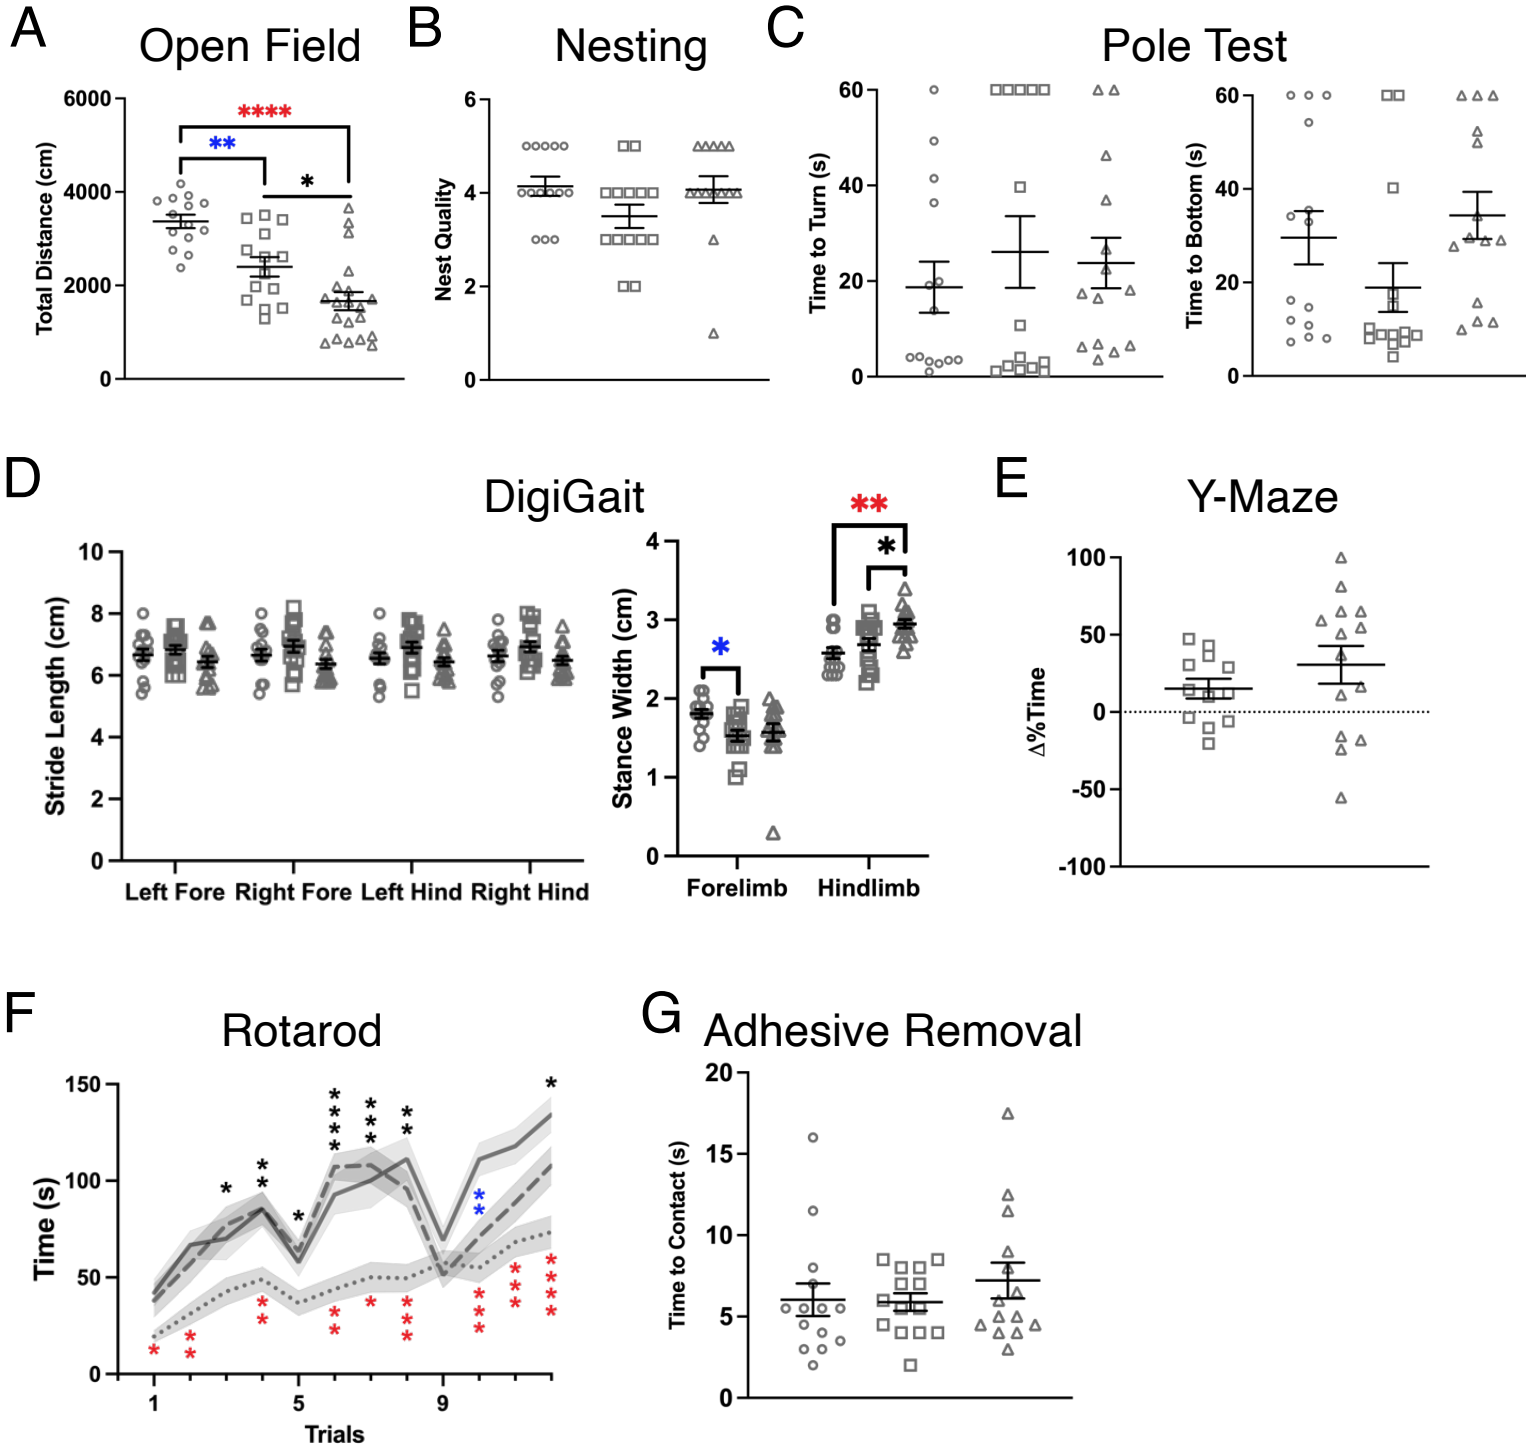

*Snca*<sup>+/+</sup> *Snca*<sup>NLS/+</sup> *Snca*<sup>NLS/NLS</sup>

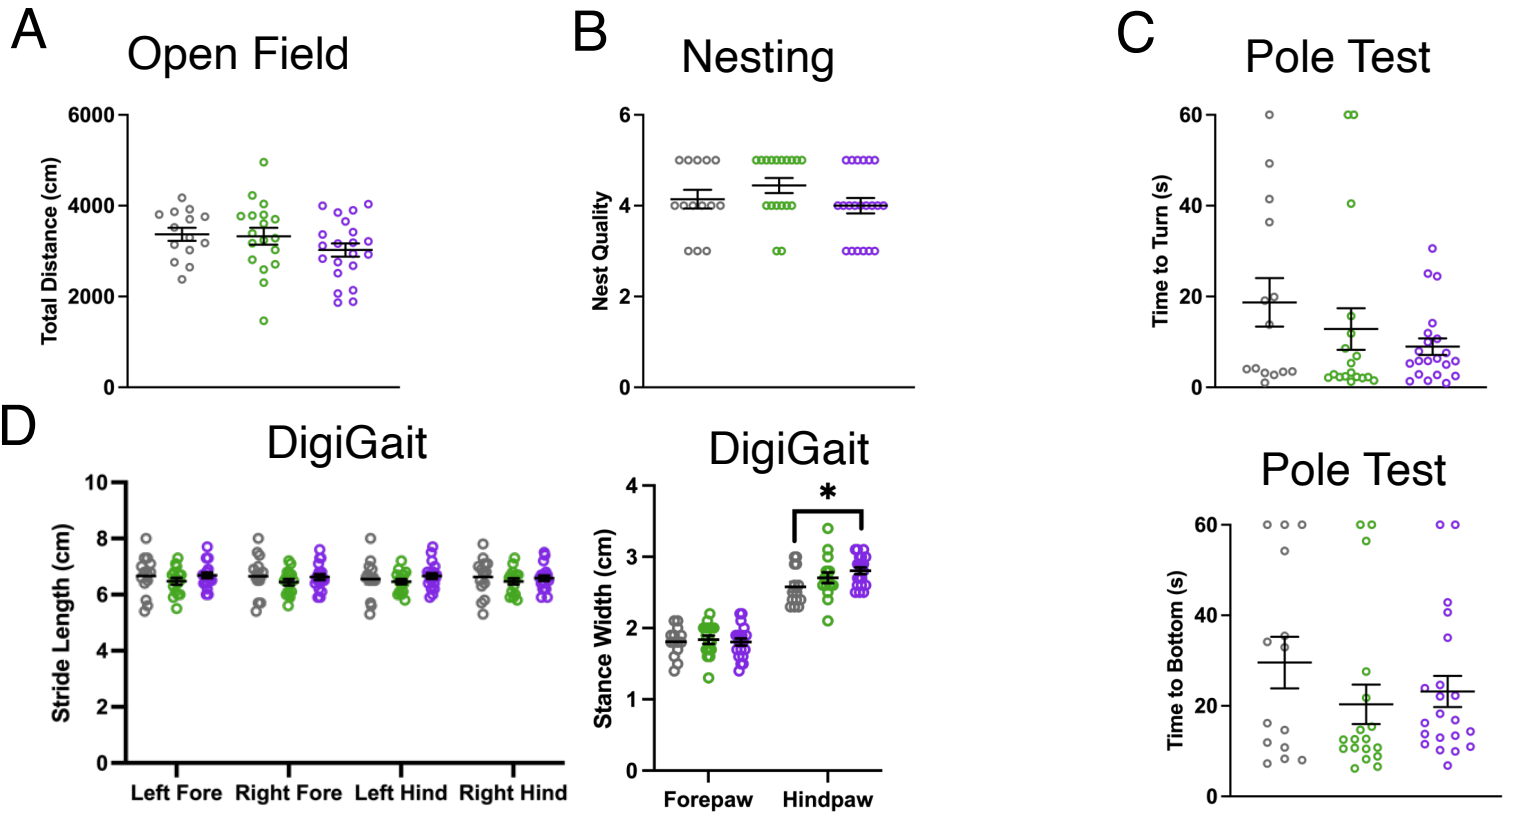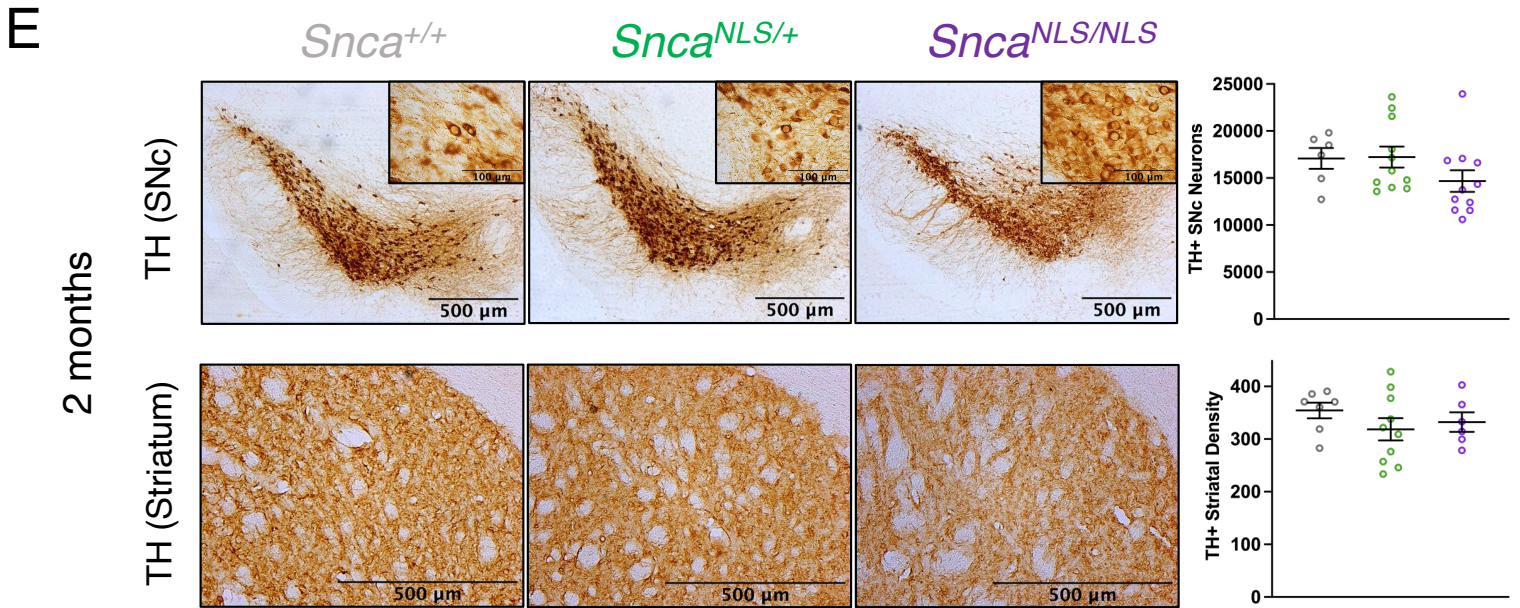

*Snca*<sup>+/+</sup> *Snca*<sup>NLS/+</sup> *Snca*<sup>NLS/NLS</sup>

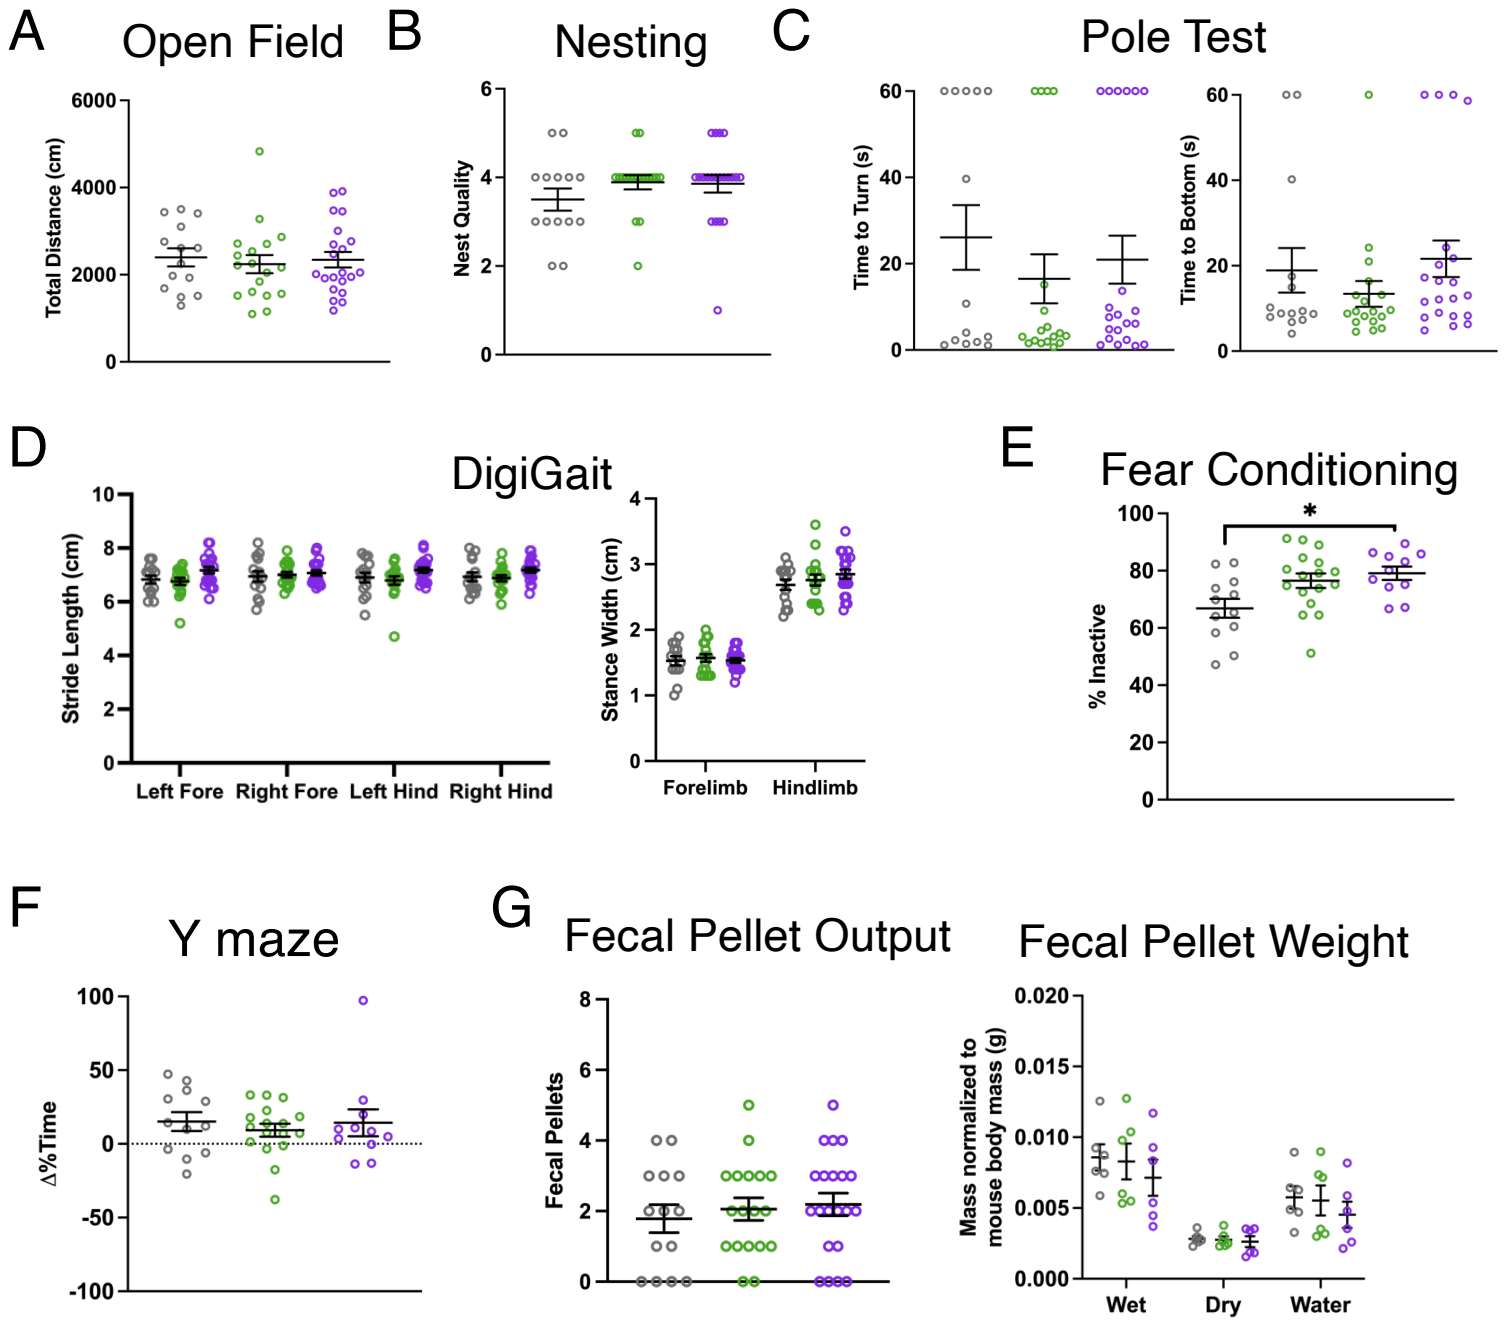

Supplemental Figure 4

*Snca*<sup>+/+</sup> *Snca*<sup>NLS/+</sup> *Snca*<sup>NLS/NLS</sup>

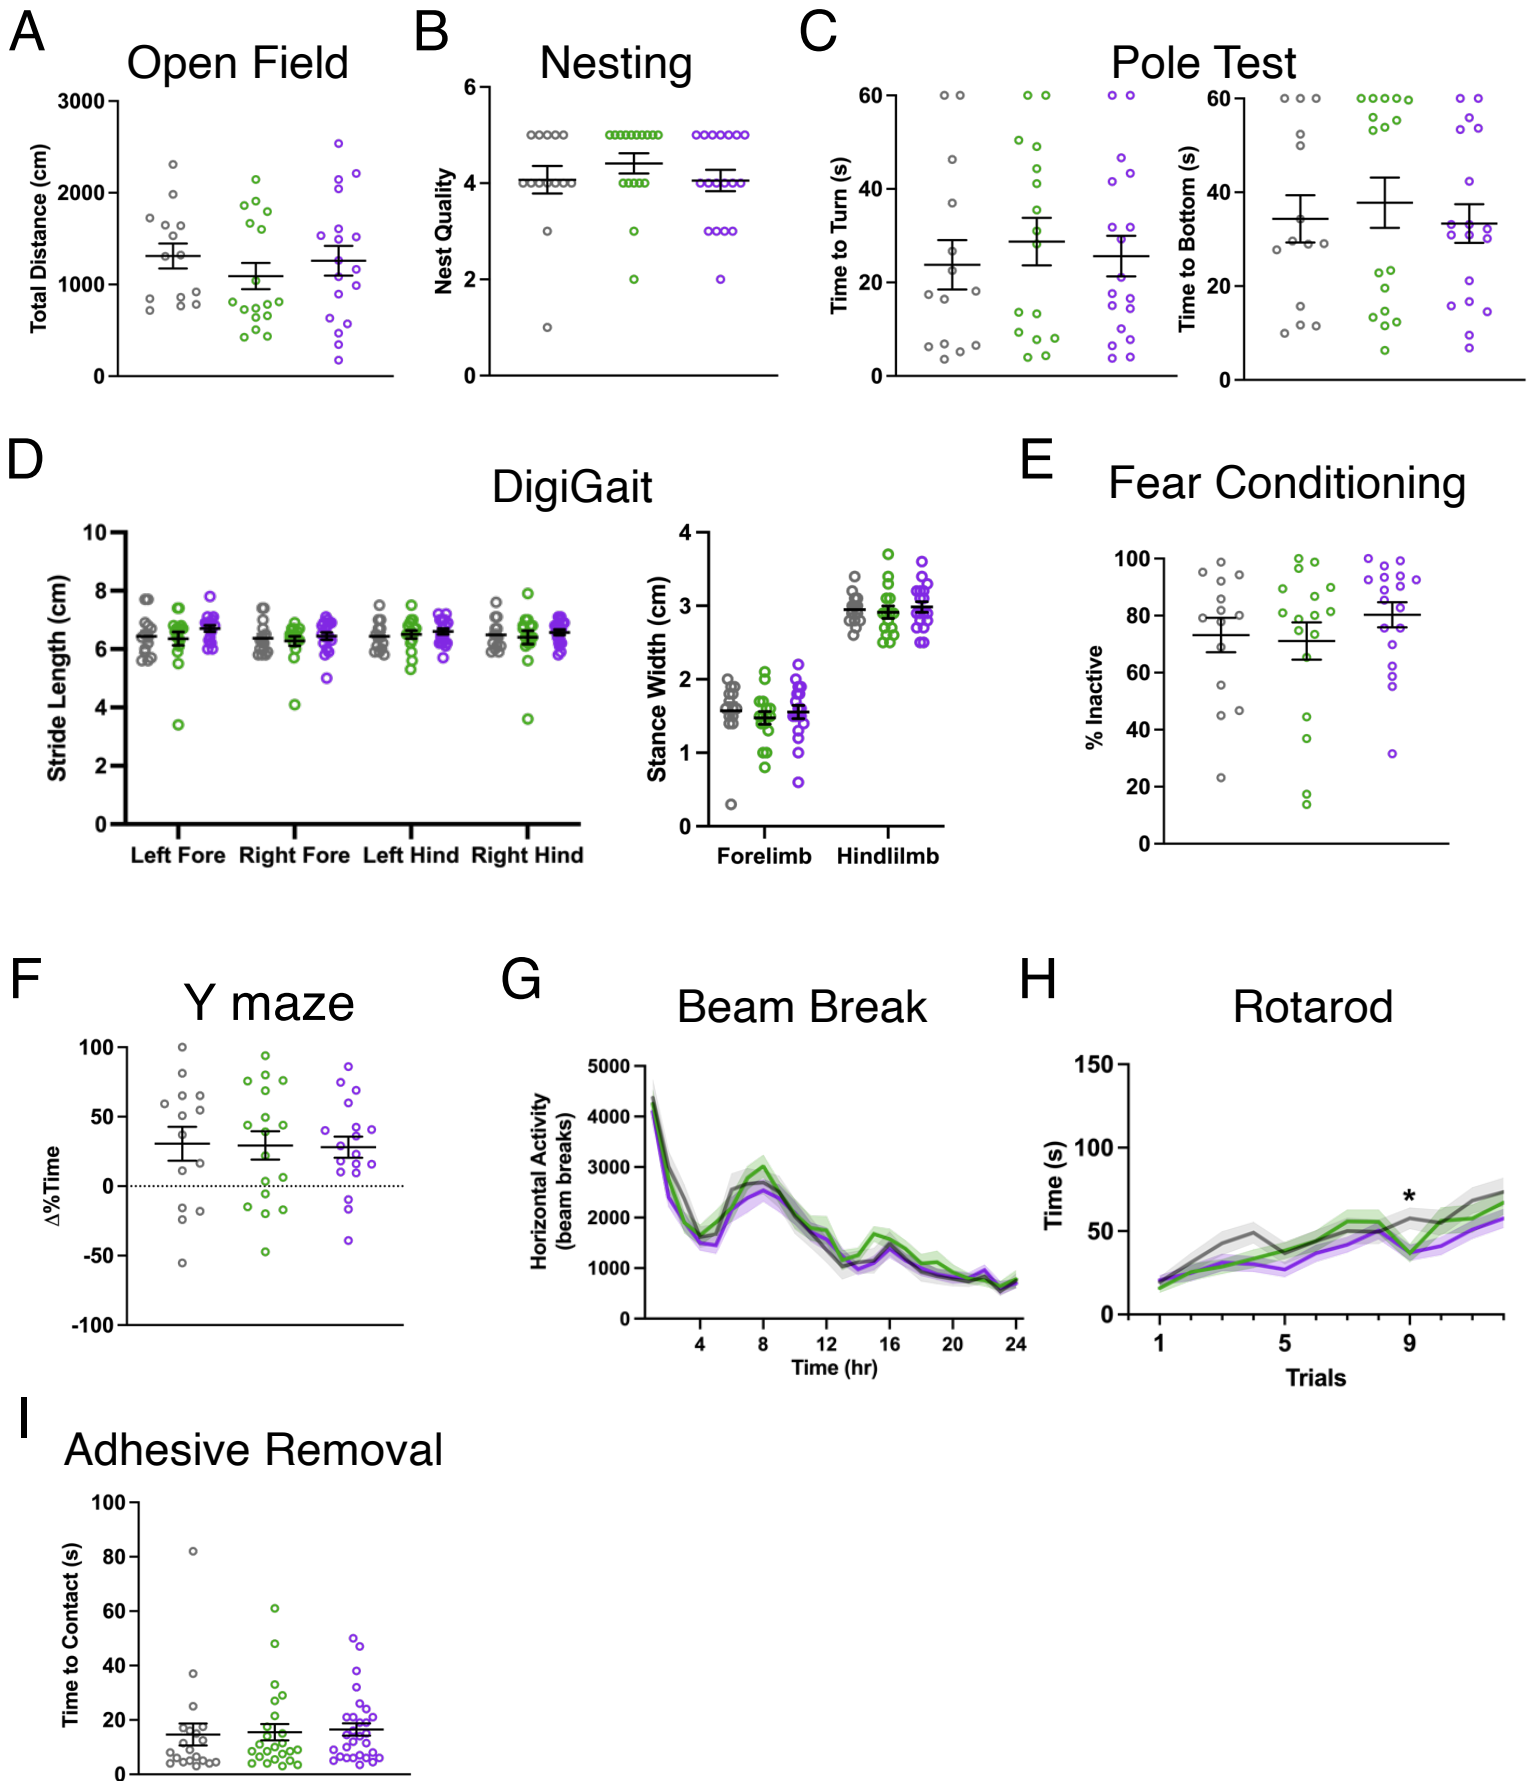

Supplemental Figure 5
